# Supplementary material for: Intergenic ORFs as elementary structural modules of de novo gene birth and protein evolution
Source: PubMed Central journal article supplement — Genome Res. 2021 Dec;31(12):2303–15. doi: 10.1101/gr.275638.121 (PMC8647833; doi:10.1101/gr.275638.121), 2021-12
Supplement: supp_gr.275638.121_Supplemental_Material.pdf [file supp_gr.275638.121_Supplemental_Material.pdf]

## Supplemental Figures & Tables

# Intergenic ORFs as elementary structural modules of de novo gene birth and protein evolution

Chris Papadopoulos<sup>1</sup>, Isabelle Callebaut<sup>2</sup>, Jean-Christophe Gelly<sup>3,4,5</sup>, Isabelle Hatin<sup>1</sup>, Olivier Namy<sup>1</sup>, Maxime Renard<sup>1</sup>, Olivier Lespinet<sup>1</sup>, Anne Lopes<sup>1</sup>

<sup>1</sup> Université Paris-Saclay, CEA, CNRS, Institute for Integrative Biology of the Cell (I2BC), 91198, Gif-sur-Yvette, France.

<sup>2</sup> Sorbonne Université, Muséum National d'Histoire Naturelle, UMR CNRS 7590, Institut de Minéralogie, de Physique des Matériaux et de Cosmochimie, IMPMC, 75005, Paris, France

<sup>3</sup> Université de Paris, Biologie Intégrée du Globule Rouge, UMR\_S1134, BIGR, INSERM, F-75015, Paris, France.

<sup>4</sup> Laboratoire d'Excellence GR-Ex, Paris, France

<sup>5</sup> Institut National de la Transfusion Sanguine, F-75015, Paris, France

### Content: 17 supplemental figures & 7 supplemental tables

|                                |                                                                                                                                       |
|--------------------------------|---------------------------------------------------------------------------------------------------------------------------------------|
| <b>Supplemental Figure S1</b>  | 3D mapping of HCA hydrophobic clusters and linkers                                                                                    |
| <b>Supplemental Figure S2</b>  | Random IGORFs behave similarly to real IGORFs for most properties                                                                     |
| <b>Supplemental Figure S3</b>  | CDS are enriched in hydrophilic residues                                                                                              |
| <b>Supplemental Figure S4</b>  | Abundant proteins are enriched in negatively charged amino acids                                                                      |
| <b>Supplemental Figure S5</b>  | CDS are enriched in ancient amino acids                                                                                               |
| <b>Supplemental Figure S6</b>  | IGORFs encompass the large spectrum of fold potential of canonical proteins (raw data)                                                |
| <b>Supplemental Figure S7</b>  | Reconstruction of the ancestral IGORFs (ancIGORFs) which gave birth to known de novo genes                                            |
| <b>Supplemental Figure S8</b>  | Appearance of a Methionine and fusion of two ancIGORFs in the <i>S. cerevisiae</i> lineage                                            |
| <b>Supplemental Figure S9</b>  | De novo gene categories display similar sizes while their corresponding ancIGORFs exhibit different sizes                             |
| <b>Supplemental Figure S10</b> | Translated IGORFs are mostly initiated with Methionine                                                                                |
| <b>Supplemental Figure S11</b> | The nucleotide composition of ancestral and highly translated IGORFs seems to play an important role in the linker's size             |
| <b>Supplemental Figure S12</b> | Impact of the hydrophobicity content and sequence length on the size of clusters and linkers                                          |
| <b>Supplemental Figure S13</b> | Effect of the sequence length, and GC content on the size of clusters and linkers                                                     |
| <b>Supplemental Figure S14</b> | Impact of the GC content on the resulting amino acid compositions                                                                     |
| <b>Supplemental Figure S15</b> | Lowly abundant proteins display a large spectrum of aggregation propensities                                                          |
| <b>Supplemental Figure S16</b> | The fusion of IGORFs can lead to longer clusters or linkers                                                                           |
| <b>Supplemental Figure S17</b> | Quality control for the 28-mer RPFs used for the detection of occasionally and selectively translated IGORFs for all five experiments |
| <b>Supplemental Table S1</b>   | One-sided Mann-Whitney <i>U</i> test p-values for all the ORF categories – Sequence length (in amino acids)                           |

|                              |                                                                                                            |
|------------------------------|------------------------------------------------------------------------------------------------------------|
| <b>Supplemental Table S2</b> | One-sided Mann-Whitney <i>U</i> test p-values for all the ORF categories - Number of clusters              |
| <b>Supplemental Table S3</b> | Two-sided Mann-Whitney <i>U</i> test p-values for all the ORF categories – Cluster size                    |
| <b>Supplemental Table S4</b> | One-sided Mann-Whitney <i>U</i> test p-values for all the ORF categories – Linker size                     |
| <b>Supplemental Table S5</b> | Strong hydrophobic residues (V,I,L,F,M,Y,W) frequency per ORF category for the three HCA score categories. |
| <b>Supplemental Table S6</b> | The 70 de novo genes of <i>Saccharomyces cerevisiae</i> used for the ancestral reconstruction.             |
| <b>Supplemental Table S7</b> | Frequencies of the three STOP codons for different ORF categories.                                         |

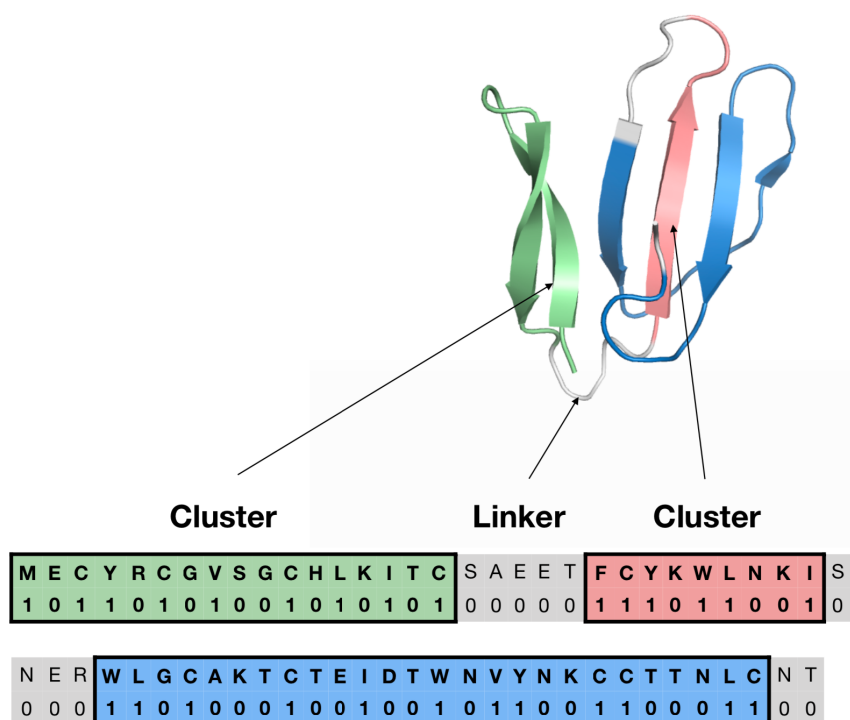

**Supplemental Figure S1 | 3D mapping of HCA hydrophobic clusters and linkers**

HCA hydrophobic clusters (colored) and linkers (in grey) delineated for the sequence of Bucandin (pdb code: 1f94). The HCA-based sequence, which consists in translating the protein sequence into a binary pattern, is given under the protein sequence. “1” corresponds to strong hydrophobic amino acids (V, I, L, F, M, Y, W) and “0” to the other amino acids (Methods; Supplemental Methods). HCA clusters and linkers are mapped on the 3D structure of Bucandin with respect to the color code used for the sequence.

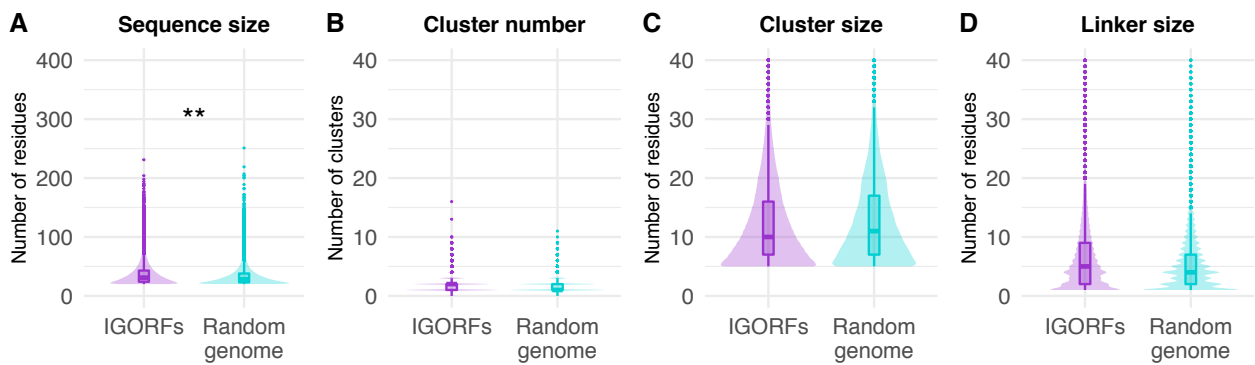

**Supplemental Figure S2 | Random IGORFs behave similarly to real IGORFs for most properties**

Boxplot distributions of sequence and HCA-based structural properties of real IGORFs and random IGORFs (A) sequence size (B) number of HCA clusters per sequence (C) size of HCA clusters (D) size of linkers. Asterisks denote level of significance: \* $p < 5 \times 10^{-2}$ , \*\* $p < 1 \times 10^{-2}$ , \*\*\* $p < 1 \times 10^{-3}$

**A****Amino acids enrichment of HCA clusters**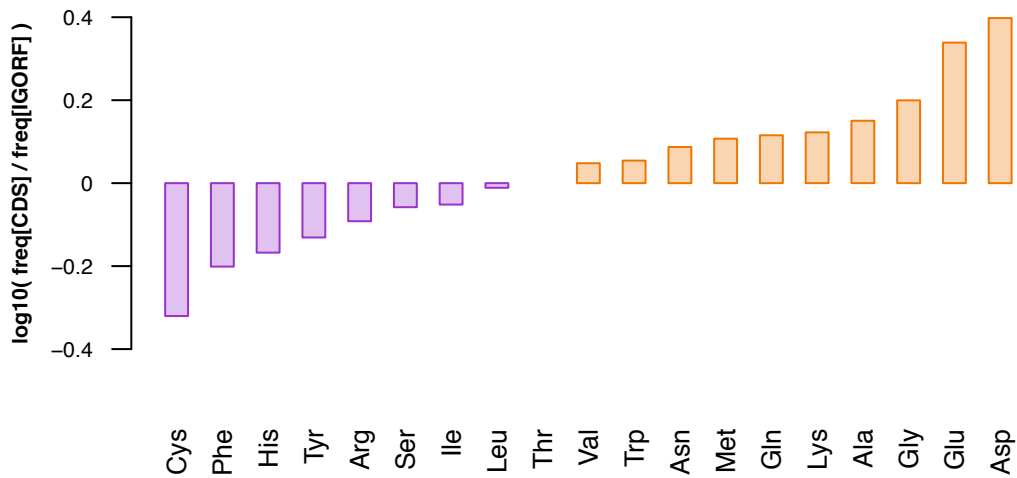**B****Amino acids enrichment of HCA linkers**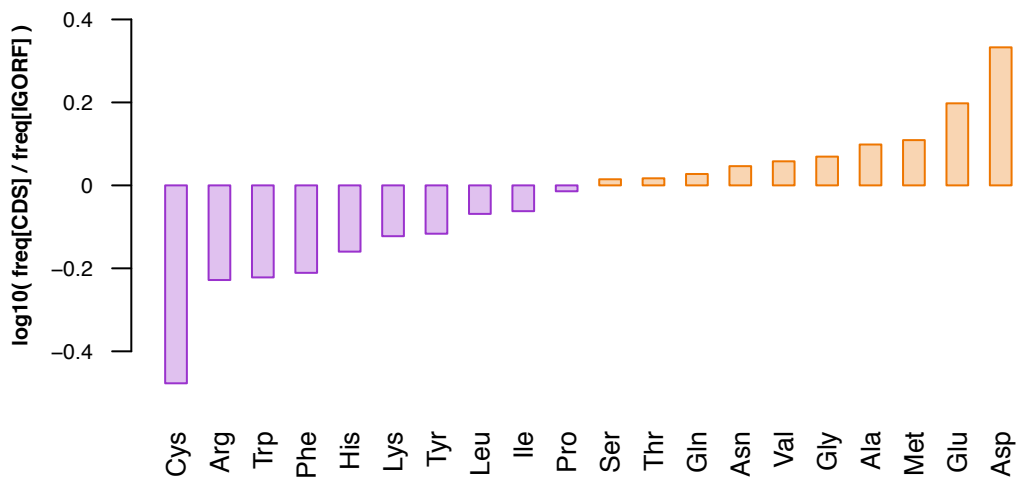**Supplemental Figure S3 | CDS are enriched in hydrophilic residues**

(A) Log ratios of amino acid frequencies in HCA clusters of CDS versus HCA clusters of IGORFs. Negative values (purple) correspond to amino acids with higher frequency in IGORF HCA clusters while positive values (orange) correspond to amino acids that are more frequent in CDS HCA linkers. (B) Log ratios of amino acid frequencies in HCA linkers of CDS versus HCA linkers of IGORFs.

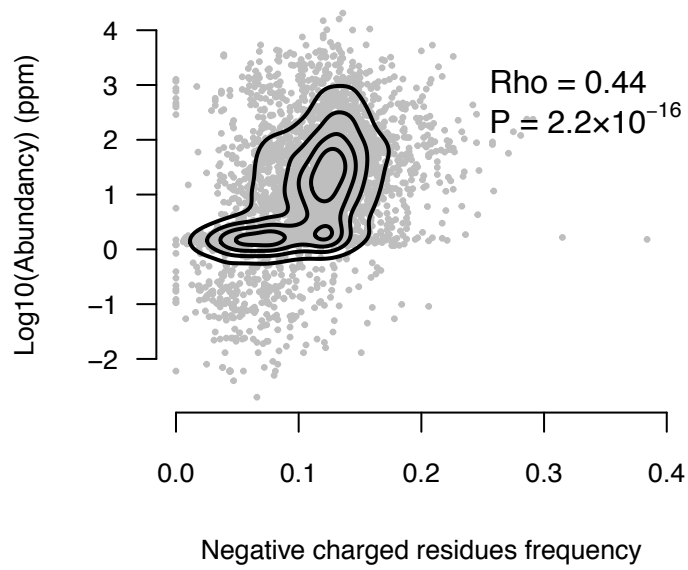

**Supplemental Figure S4 | Abundant proteins are enriched in negatively charged amino acids**

Protein abundances (in parts per million) of all cytoplasmic proteins are plotted against their corresponding negatively charged residues (Aspartate and Glutamate) frequencies. The Spearman rank correlation coefficient is indicated on the plot ( $p\text{-value} < 2.2 \times 10^{-16}$ ).

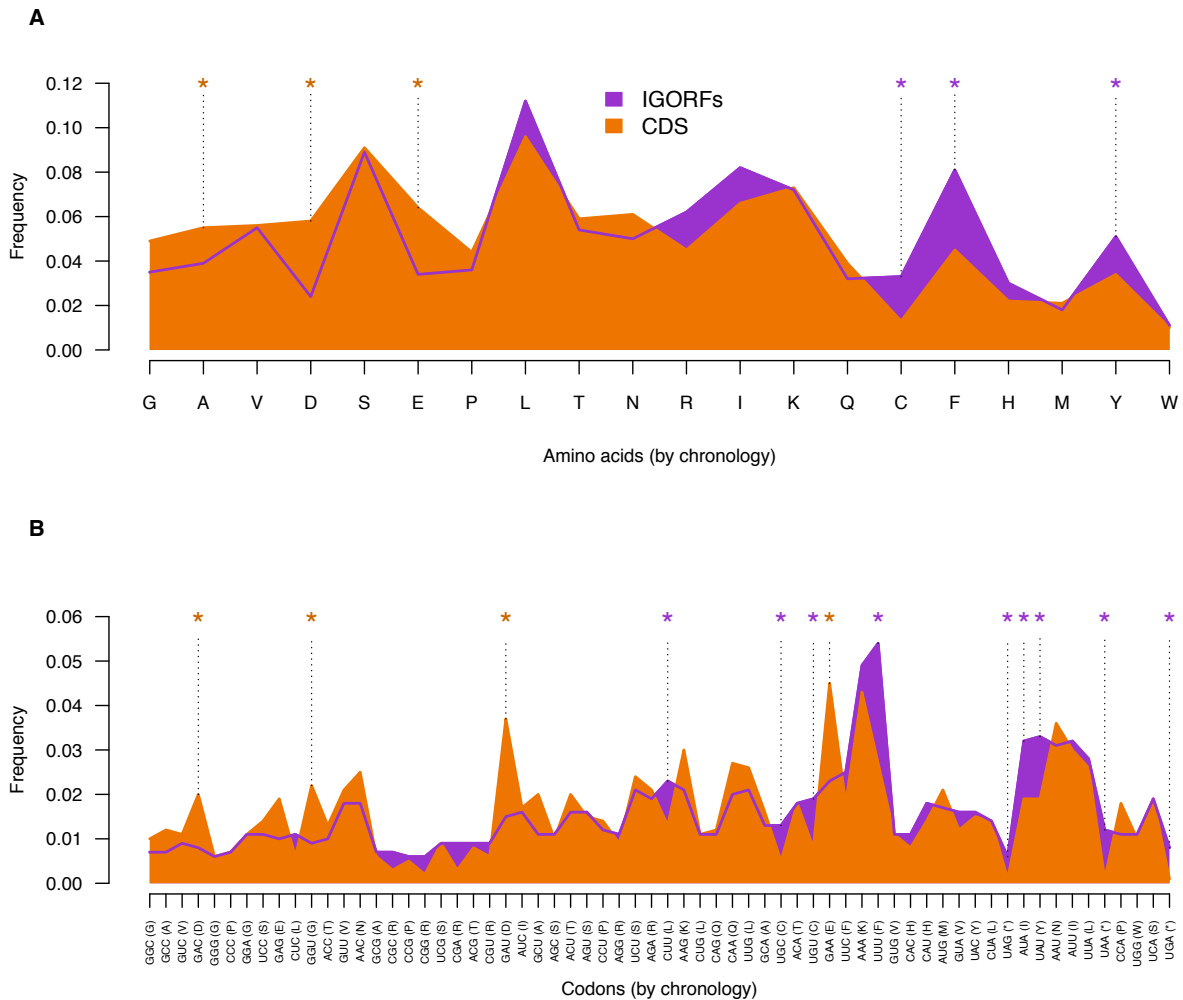

### Supplemental Figure S5 | CDS are enriched in ancient amino acids

(A) Frequencies of amino acids of CDS (orange) and IGORFs (purple) ordered according to their chronology of appearance during evolution as defined in Trifonov et al. (2001) (B) Frequencies of codons of CDS (orange) and IGORFs (purple) ordered according to their chronology of appearance during evolution as defined in Trifonov et al. (2001). Amino acids or codons enriched in CDS or IGORFs are indicated by orange or purple stars respectively (z-test,  $p$ -values  $< 5 \times 10^{-2}$ ).

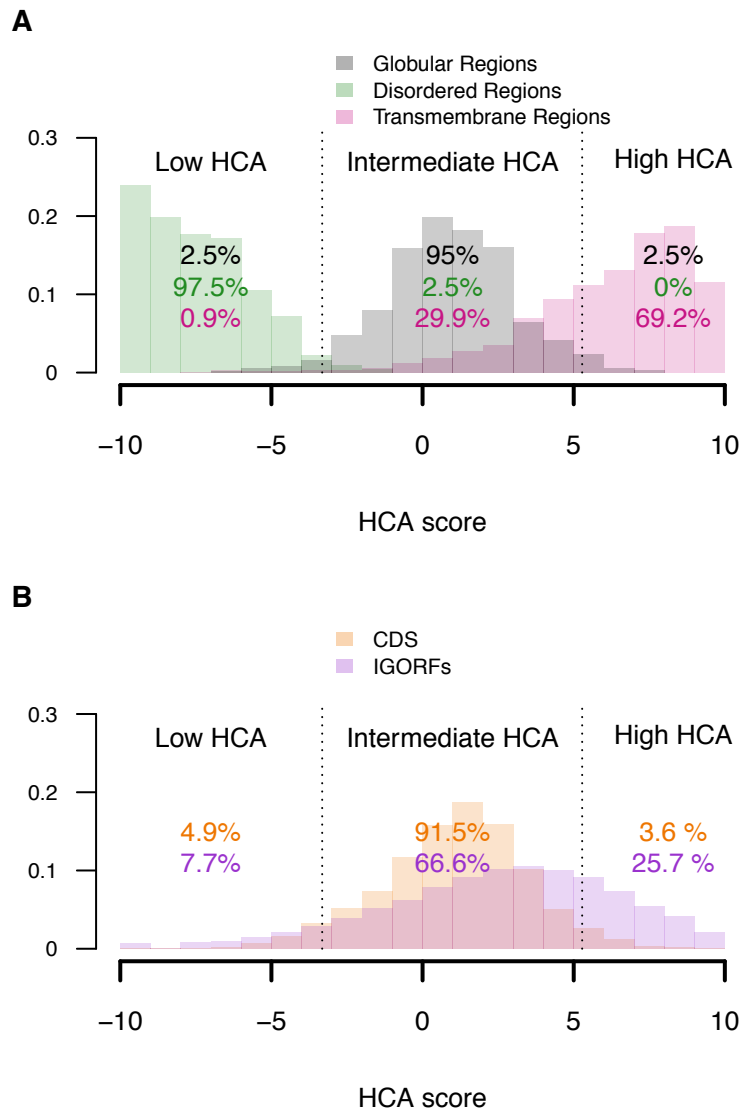

**Supplemental Figure S6 | IGORFs encompass the large spectrum of fold potential of canonical proteins (raw data)**

(A) Histograms of the HCA scores of the three reference datasets (i.e. disordered regions, globular domains and transmembrane regions – green, black and pink histograms respectively). Dotted black lines delineate the boundaries of the low, intermediate and high HCA score categories. The boundaries are defined so that 95% of globular domains fall into the intermediate HCA score category whereas the low and high HCA score categories include all sequences with HCA values that are lower or higher than those of 97.5% of globular domains respectively. (B) Histograms of the HCA scores of CDS and IGORFs. The percentages of sequences in each category are given for all datasets.



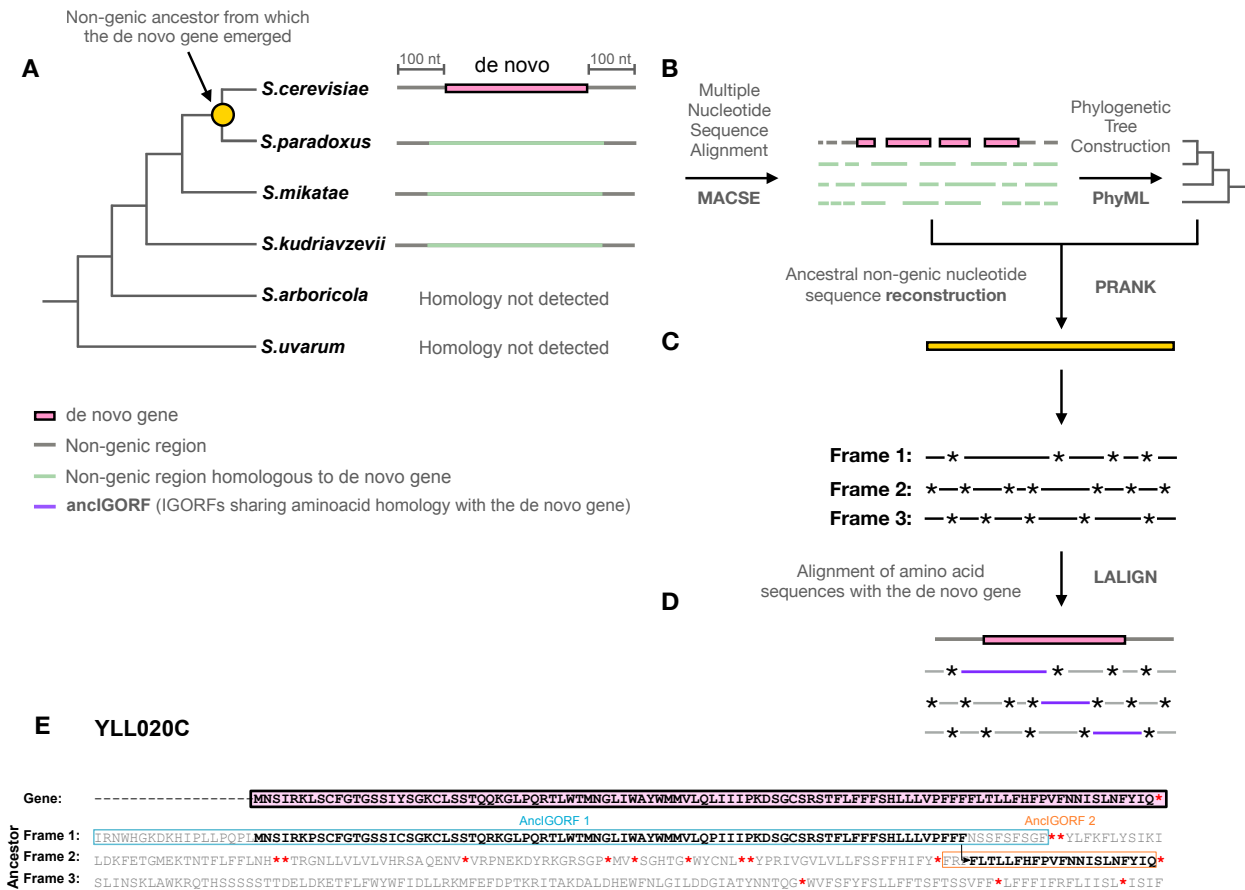

### Supplemental Figure S7 | Reconstruction of the ancestral IGORFs (ancIGORFs) which gave birth to known de novo genes

(A) Identification of homologous sequences (that can be an orthologous gene or a homologous noncoding sequence) of the de novo gene of interest in all neighboring species with blast (Altschul et al. 1990) (see Methods for more details) (B) Multiple sequence alignment of the detected homologous nucleotide sequences with MACSE (Ranwez et al. 2011, 2018) and construction of their phylogenetic tree with PhyML (Guindon et al. 2010) (C) reconstruction of the corresponding ancestral nongenic nucleotide sequence (in yellow) with PRANK (Löytynoja and Goldman 2010). The latter is subsequently translated into the three frames. STOP codons are indicated with stars. (D) Alignment of all the reconstructed IGORFs (amino acid sequences) with the de novo gene(s) of interest with LALIGN (Huang and Miller 1991) and detection of the IGORFs sharing a homology with it (i.e. ancIGORFs) (E) Alignment of the *S. cerevisiae* de novo gene YLL020C with the translation products of its corresponding ancestral noncoding sequence as predicted for the ancestor of *S. cerevisiae* and *S. paradoxus*. STOP codons are indicated with red stars. The two IGORFs which gave birth to the YLL020C gene (ancIGORFs) are indicated by blue and orange boxes respectively. The two ancIGORFs are distributed across two frames showing that the current version of YLL020C results from an indel event which induces a frameshift in the original sequence. The sections of the ancIGORFs that participate in the resulting de novo gene are indicated in bold. The HCA scores of the blue and orange IGORFs are 0.48 (foldable) and 7.71 (aggregation-prone) respectively.

YOR333C

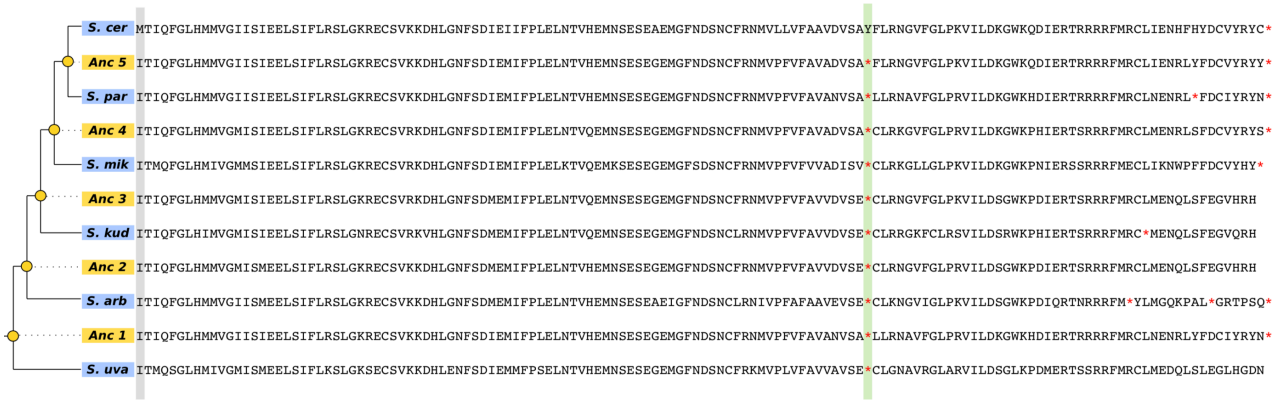

**Supplemental Figure S8 | Appearance of a Methionine and fusion of two ancIGORFs in the *S. cerevisiae* lineage**

The sequences of the YOR333C de novo gene and its corresponding noncoding regions in the five neighboring species of *S. cerevisiae* are indicated in blue. The ancestral sequences are indicated in yellow. STOP codons are represented with red stars. The appearance of the Methionine in the *S. cerevisiae* lineage is highlighted with a grey box while the STOP codon mutation that led to the fusion of the two ancIGORFs in the *S. cerevisiae* lineage is indicated with a green box.

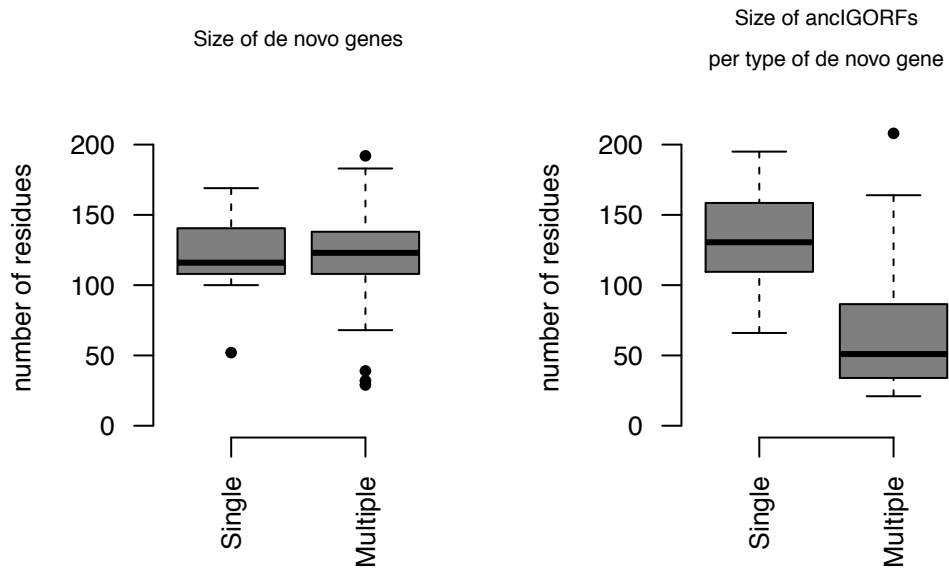

**Supplemental Figure S9 | De novo gene categories display similar sizes while their corresponding ancIGORFs exhibit different sizes**

(A) Boxplot comparing the sequence size of multiple and single ancIGORF de novo genes. (B) Boxplot comparing the sequence size of ancIGORFs preceding the emergence of single and multiple ancIGORF de novo genes.

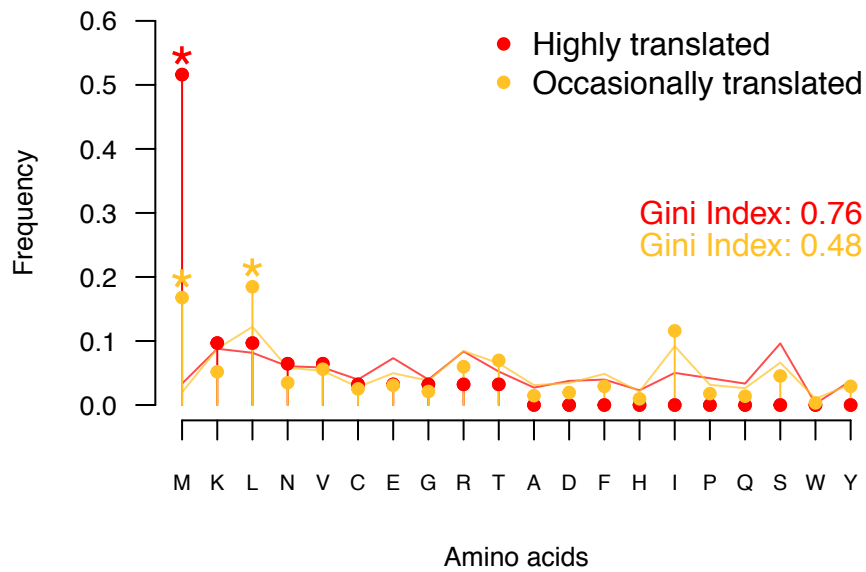

### Supplemental Figure S10 | Translated IGORFs are mostly initiated with Methionine

Frequencies of the 20 amino acids at the first translated position for highly translated IGORFs (red) and occasionally translated ones (yellow). Gini indexes which reflect the statistical dispersion of the 20 amino acids at the first translated position are given for highly and occasionally translated IGORFs in red and yellow respectively. Gini index values range from 0 to 1 and high values reflect the fact that the first translated positions are enriched in specific amino acids, particularly, in MET and to a lesser extent in LEU for occasionally translated IGORFs. Amino acids which are significantly observed at the first translated position compared to the other translated positions are indicated with a star (z-test p.value  $< 5 \times 10^{-2}$ ).

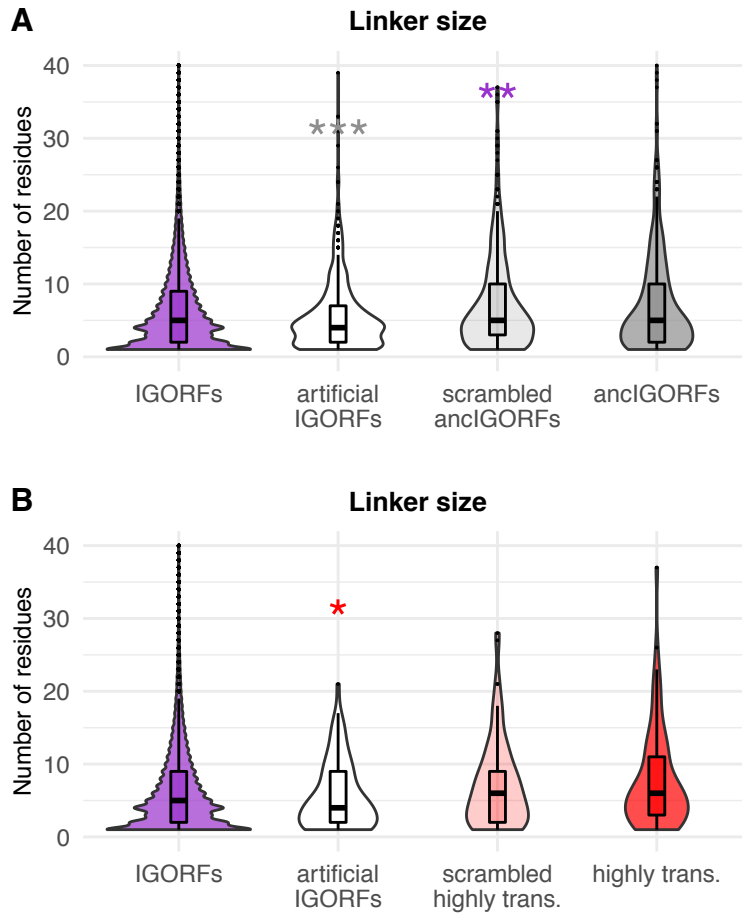

**Supplemental Figure S11 | The nucleotide composition of ancestral and highly translated IGORFs seems to play an important role in the linker's size**

(A) Linkers' size for real IGORFs (purple), artificial IGORFs (i.e. ORFs with size similar to ancIGORFs but nucleotide composition of IGORFs) (white), ancIGORFs with scrambled nucleotides (light grey) and real ancIGORFs (grey). (B) Linkers' size for real IGORFs (purple), artificial IGORFs (i.e. ORFs with size similar to highly translated IGORFs but nucleotide composition of IGORFs) (white), highly translated IGORFs with scrambled nucleotides (light red) and real highly translated IGORFs (red). The p-values were computed with the Mann-Whitney  $U$  test (one-sided). Asterisks denote level of significance: \* $p < 5 \times 10^{-2}$ , \*\* $p < 1 \times 10^{-2}$ , \*\*\* $p < 1 \times 10^{-3}$ . The color of the asterisks indicates the ORF category used for the comparison.

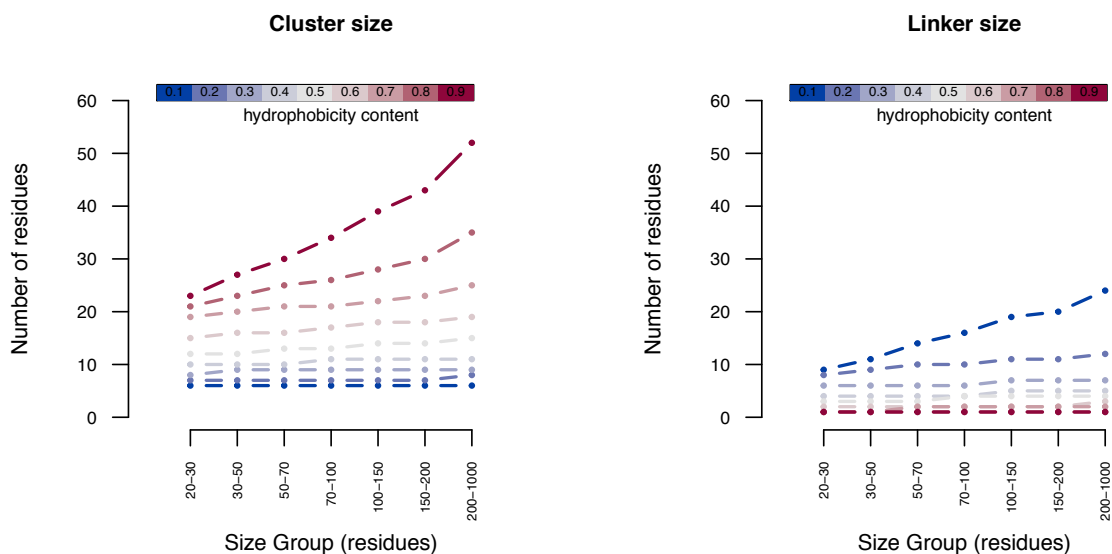

### Supplemental Figure S12 | Impact of the hydrophobicity content and sequence length on the size of clusters and linkers

In order to properly decipher the contributions of the amino acid composition and sequence length, we generated artificial sequences with different sizes and different hydrophobic residue contents (1000 sequences per bin of sequence size and hydrophobicity content). (A) The median values of the resulting cluster sizes are subsequently plotted in number of residues. (B) For the same artificial sequences, the median values of the resulting linker sizes are plotted in number of residues. In both plots sequences are colored according to their hydrophobicity content that ranges from 0.1 (i.e. 10% of strong hydrophobic residues according to HCA definition: V, I, L, M, Y, F, W and C) to 0.9. For a given sequence length, hydrophobic and hydrophilic contents have a significant impact on the size of clusters and linkers respectively with an even more important effect on long sequences.

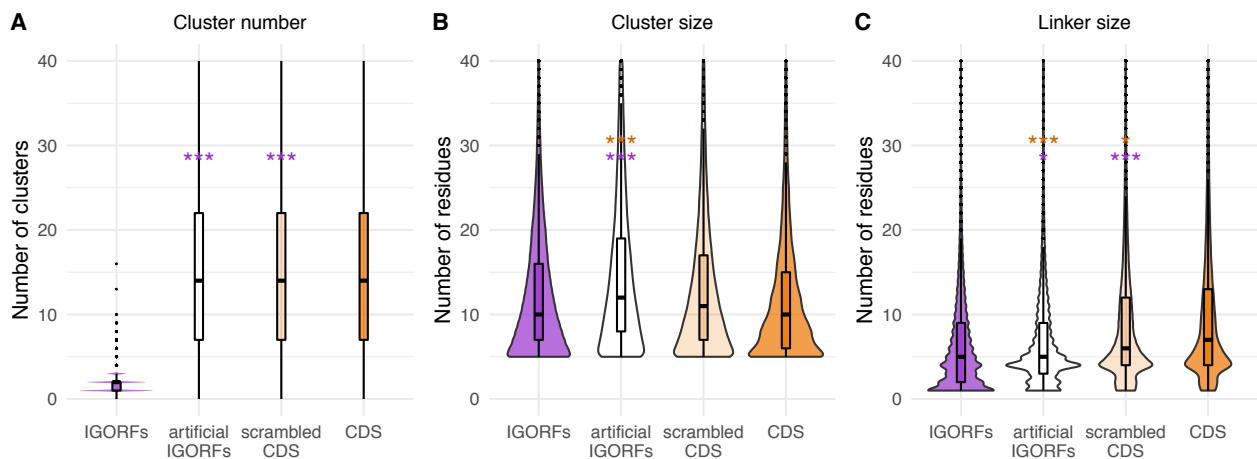

### Supplemental Figure S13 | Effect of the sequence length, and GC content on the size of clusters and linkers

Number of HCA clusters (A), size of HCA clusters (B) and size of linkers (C) for real CDS sequences (orange), scrambled CDS sequences (light orange) and artificial IGORFs (i.e. with size similar to CDS but nucleotide compositions of IGORFs) (white). The clusters of scrambled CDS are similar to those of CDS while their linkers are slightly shorter (Mann-Whitney  $U$  test,  $P = 4 \times 10^{-2}$ ) showing that randomly and according to the GC content and size of CDS, long though slightly shorter linkers can be generated. In contrast, the linkers of artificial IGORFs are of comparable size to those of IGORFs though slightly larger, while the artificial clusters are longer (Mann-Whitney  $U$  test,  $P = 4 \times 10^{-2}$  and  $P = 6 \times 10^{-4}$  respectively). This reflects that at the IGORF GC content, the sequence length alone has a small impact on cluster size while the effect is marginal on linker size, and overall cannot explain the increase in linker size observed for CDS. Indeed, the artificial linkers are clearly shorter than those of both real and scrambled CDS (Mann-Whitney  $U$  test,  $P = 7.1 \times 10^{-8}$  and  $2 \times 10^{-4}$  respectively) highlighting the impact of the amino acid composition but also of the GC content of the CDS on their linker size. The p-values were computed with the Mann-Whitney  $U$  test (one-sided). Asterisks denote level of significance: \* $p < 5 \times 10^{-2}$ , \*\* $p < 1 \times 10^{-2}$ , \*\*\* $p < 1 \times 10^{-3}$ . The color of the asterisks indicates the ORF category used for the comparison.

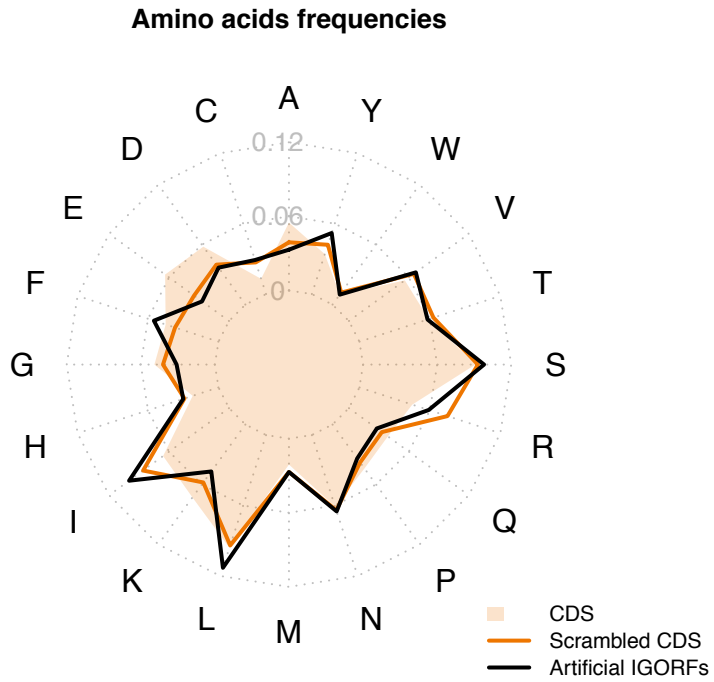

**Supplemental Figure S14 | Impact of the GC content on the resulting amino acid compositions**

Radar plot reflecting the 20 amino acid frequencies for real CDS (light orange shadow), scrambled CDS (orange line) and artificial IGORFs (i.e. sequences with size similar to CDS but nucleotide compositions of IGORFs (black line)). CDS and artificial IGORFs exhibit slightly different GC contents (GC content of 36.1% and 39.6% for IGORFs and CDS respectively) that lead to slightly different amino acid compositions.



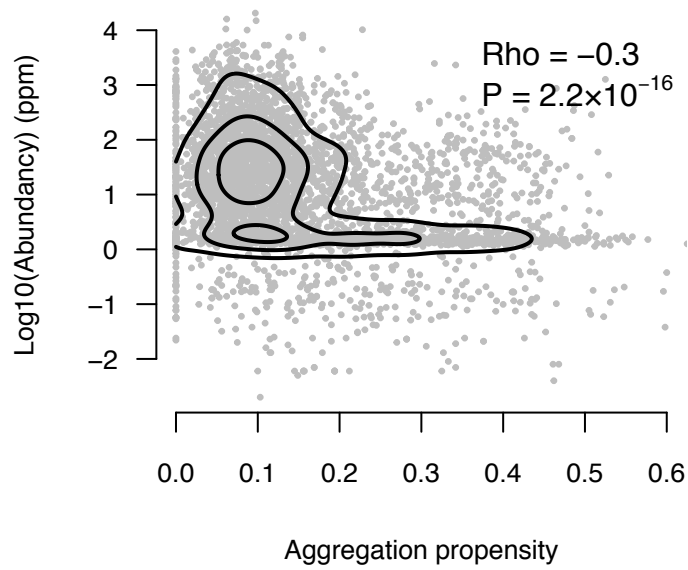

**Supplemental Figure S15 | Lowly abundant proteins display a large spectrum of aggregation propensities**

Protein abundances (in parts per million) of all cytoplasmic proteins are plotted against their corresponding aggregation propensity predicted with TANGO (Linding et al. 2004; Fernandez-Escamilla et al. 2004; Rousseau et al. 2006). The Spearman rank correlation coefficient is -0.30 with p-value  $< 2.2 \times 10^{-16}$ .

**A**

**YMR153C-A**

```
S. cer MLESHQSTTFGGKVFHYKSFHPNNOLEFNLFNQLFLLLLACSLFFKSDSIELRTPWIFPLFLKNNRPSFISSLRGFLKEVEFLETLSALRTPFEVTAFALAFSKIIPSVFL*
110000000100011010010000011011001111110101110000101000111101110000000110010011001011001000100101010100100111
↑ STOP codon mutation                                ↑ STOP codon mutation                                ↑ STOP codon mutation
Ancestor C*NHTKCIITFGGIGFYRSHFPNNOLEFNLFNQLFLLPACSLFFKSDSMELRTP*IFPLFLKNNDRPSFISSLRGFLKELEFLETLSGLRTPFEVTA*DLSKIPSLFL*
1 00001101001011100100000110110011111001011100001010001 1101110000000110010011001011001000100101011 0100100111
```

**B**

**YPR126C**

```
S. cer MLARVAESVSCGLMGQVKTGLLLEFDGSGFSDRLGVMRFYVWSSRIYVVLVQVQALILDAHNGVLFLLFFLHNFLLPQLFQFLLSGCLIFLNDVYFNLMV*
110010001010110010001111000010001011011110001111111000111000001111111100111100110111001111001110111
↑ STOP codon mutation                                ↑ STOP codon mutation
Ancestor MLARVAESVSCG*MGVVKTGLLLEFDGSSFSNREGVLRFYVWSSRIYVVLVQV*QALILDAHNGVLFLLFFLHDFLLPQLFQFLLSRCFIFLNDVYFNLMV*
110010001010 10110001111000010001011011110001111111 00111000001111111100111100111001111001110111
```

**Supplemental Figure S16 | The fusion of IGORFs can lead to longer clusters or linkers**

The sequence of the YMR153C-A de novo gene (A) and YPR126C (B) are indicated by the blue boxes while their corresponding ancestral sequences are indicated by the yellow boxes. STOP codons are represented by red stars. HCA clusters are highlighted by red boxes while HCA linkers correspond to the regions connecting two HCA clusters or extremities that are not associated with an HCA cluster.

**GSM2147982 – CDS phasing**

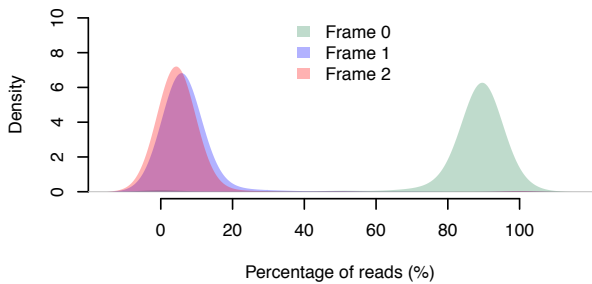

**GSM2147982 – CDS periodicity**

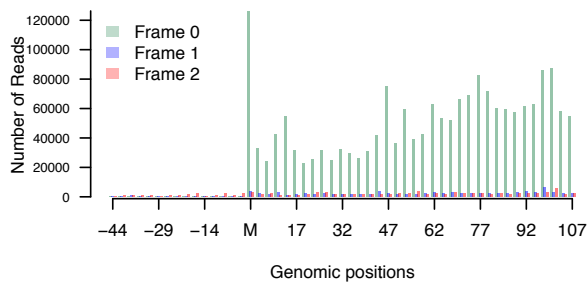

**GSM2147983 – CDS phasing**

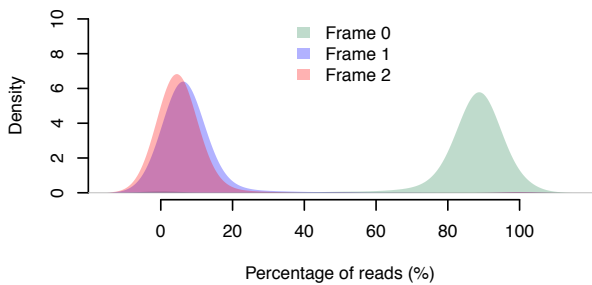

**GSM2147983 – CDS periodicity**

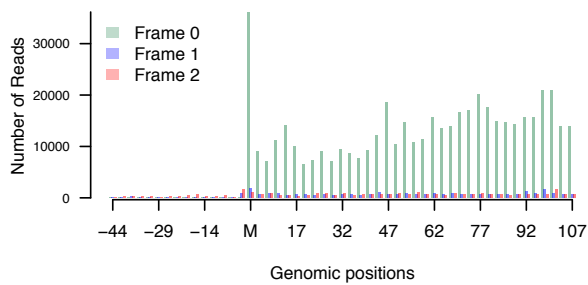

**GSM5282046 – CDS phasing**

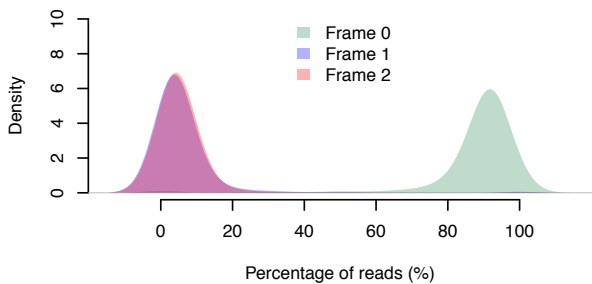

**GSM5282046 – CDS periodicity**

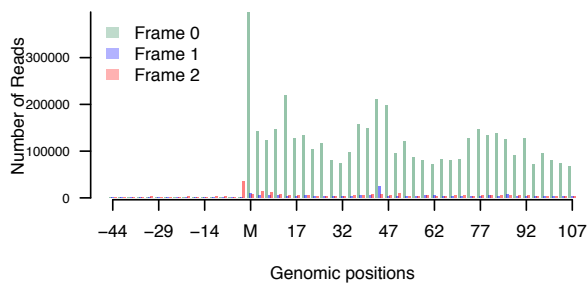

**GSM5282047 – CDS phasing**

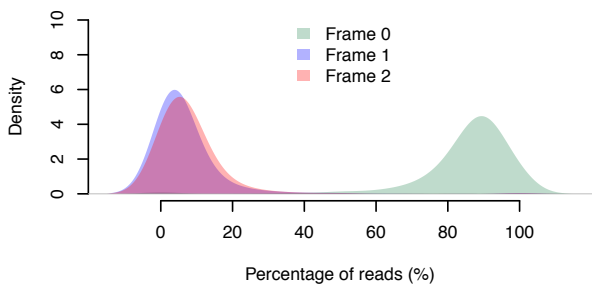

**GSM5282047 – CDS periodicity**

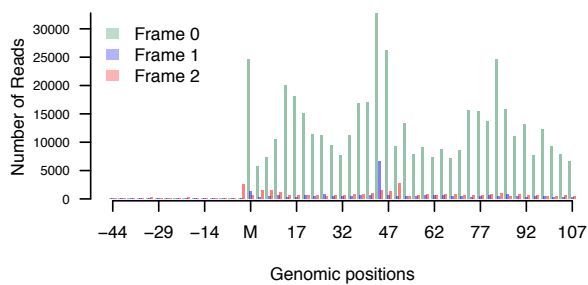

**GSM1850252 – CDS phasing**

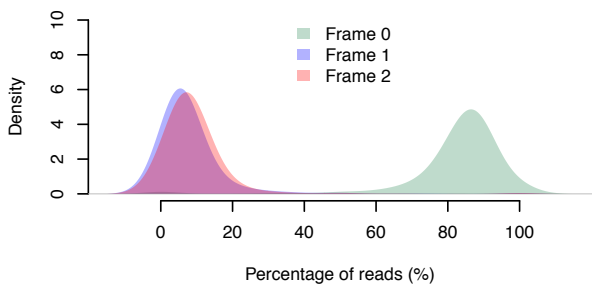

**GSM1850252 – CDS periodicity**

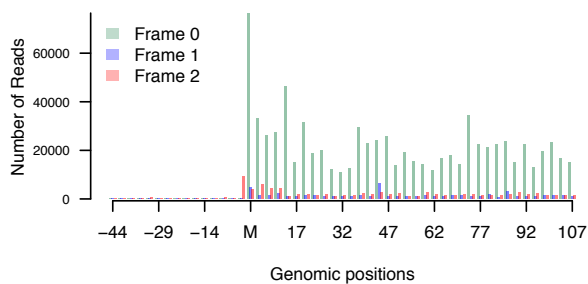

**Supplemental Figure S17 | Quality control for the 28-mer Ribosome Protected Fragments (RPFs) used for the detection of occasionally and selectively translated IGORFs for all five experiments**

The left panel shows that 90% (on average) of the 28-mer RPFs are in frame with the start codon of the CDS (Frame 0). The right panel presents the number of RPFs at each nucleotide position (determined by the site P of each 28-mer) showing accumulation of signal over the CDS (reads detected only after the start codon), and a nice periodicity (of frame 0) over the 100 first nucleotides. These results inform us about the good quality of the RPF data in all five experiments.

**Supplemental Table S1.** One-sided Mann-Whitney *U* test p-values for all the ORF categories – Sequence length (in amino acids)

|                         | IGORFs | Occasionally translated | Highly translated  | Ancestral IGORFs      | De novo genes         | CDS                    |
|-------------------------|--------|-------------------------|--------------------|-----------------------|-----------------------|------------------------|
| IGORFs                  | -      | $3 \times 10^{-4}$      | $3 \times 10^{-2}$ | $2.2 \times 10^{-23}$ | $5.2 \times 10^{-38}$ | $1.4 \times 10^{-153}$ |
| Occasionally translated |        | -                       | $2 \times 10^{-1}$ | $1.3 \times 10^{-15}$ | $1.8 \times 10^{-36}$ | $1.0 \times 10^{-150}$ |
| Highly translated       |        |                         | -                  | $1.3 \times 10^{-3}$  | $1.5 \times 10^{-13}$ | $2.2 \times 10^{-19}$  |
| Ancestral IGORFs        |        |                         |                    | -                     | $1.1 \times 10^{-16}$ | $1.7 \times 10^{-63}$  |
| De novo genes           |        |                         |                    |                       | -                     | $5.2 \times 10^{-20}$  |
| CDS                     |        |                         |                    |                       |                       | -                      |

**Supplemental Table S2.** One-sided Mann-Whitney *U* test p-values for all the ORF categories - Number of clusters

|                         | IGORFs | Occasionally translated | Highly translated  | Ancestral IGORFs      | De novo genes         | CDS                    |
|-------------------------|--------|-------------------------|--------------------|-----------------------|-----------------------|------------------------|
| IGORFs                  | -      | $2 \times 10^{-2}$      | $6 \times 10^{-2}$ | $3.2 \times 10^{-15}$ | $1 \times 10^{-35}$   | $7 \times 10^{-148}$   |
| Occasionally translated |        | -                       | $2 \times 10^{-1}$ | $8 \times 10^{-11}$   | $3.3 \times 10^{-33}$ | $1.9 \times 10^{-142}$ |
| Highly translated       |        |                         | -                  | $1 \times 10^{-2}$    | $1.1 \times 10^{-10}$ | $2.2 \times 10^{-18}$  |
| Ancestral IGORFs        |        |                         |                    | -                     | $1.7 \times 10^{-13}$ | $1.8 \times 10^{-60}$  |
| De novo genes           |        |                         |                    |                       | -                     | $3.3 \times 10^{-20}$  |
| CDS                     |        |                         |                    |                       |                       | -                      |

**Supplemental Table S3.** Two-sided Mann-Whitney *U* test p-values for all the ORF categories – Cluster size

|                         | IGORFs | Occasionally translated | Highly translated  | Ancestral IGORFs   | De novo genes      | CDS                |
|-------------------------|--------|-------------------------|--------------------|--------------------|--------------------|--------------------|
| IGORFs                  | -      | $5 \times 10^{-1}$      | $7 \times 10^{-1}$ | $6 \times 10^{-1}$ | $8 \times 10^{-2}$ | $1 \times 10^{-1}$ |
| Occasionally translated |        | -                       | $6 \times 10^{-1}$ | $6 \times 10^{-1}$ | $6 \times 10^{-2}$ | $1 \times 10^{-1}$ |
| Highly translated       |        |                         | -                  | $7 \times 10^{-1}$ | $4 \times 10^{-1}$ | $2 \times 10^{-1}$ |
| Ancestral IGORFs        |        |                         |                    | -                  | $5 \times 10^{-2}$ | $1 \times 10^{-1}$ |
| De novo genes           |        |                         |                    |                    | -                  | $2 \times 10^{-3}$ |
| CDS                     |        |                         |                    |                    |                    | -                  |

**Supplemental Table S4.** One-sided Mann-Whitney *U* test p-values for all the ORF categories – Linker size

|                         | IGORFs | Occasionally translated | Highly translated  | Ancestral IGORFs   | De novo genes      | CDS                   |
|-------------------------|--------|-------------------------|--------------------|--------------------|--------------------|-----------------------|
| IGORFs                  | -      | $1 \times 10^{-1}$      | $2 \times 10^{-2}$ | $1 \times 10^{-2}$ | $9 \times 10^{-5}$ | $6.3 \times 10^{-11}$ |
| Occasionally translated |        | -                       | $9 \times 10^{-2}$ | $1 \times 10^{-1}$ | $2 \times 10^{-3}$ | $1.5 \times 10^{-8}$  |
| Highly translated       |        |                         | -                  | $7 \times 10^{-1}$ | $3 \times 10^{-1}$ | $8 \times 10^{-3}$    |
| Ancestral IGORFs        |        |                         |                    | -                  | $3 \times 10^{-2}$ | $7.9 \times 10^{-7}$  |
| De novo genes           |        |                         |                    |                    | -                  | $1.1 \times 10^{-3}$  |
| CDS                     |        |                         |                    |                    |                    | -                     |

**Supplemental Table S5.** Strong hydrophobic residues (V,I,L,F,M,Y,W) frequency per ORF category for the three HCA score categories.

|                         | Low<br>HCA | Intermediate<br>HCA | High<br>HCA | Total |
|-------------------------|------------|---------------------|-------------|-------|
| IGORFs                  | 0.239      | 0.391               | 0.508       | 0.410 |
| Occasionally translated | 0.241      | 0.384               | 0.494       | 0.401 |
| Highly translated       | 0.251      | 0.355               | 0.406       | 0.353 |
| Ancestral IGORFs        | 0.241      | 0.376               | 0.508       | 0.392 |
| De novo genes           | 0.215      | 0.398               | 0.479       | 0.410 |
| CDS                     | 0.219      | 0.332               | 0.475       | 0.328 |

**Supplemental Table S6.** ORF names of the 70 de novo genes of *Saccharomyces cerevisiae* used for the ancestral reconstruction. For the last two columns the hydrophobic residues considered are: V,I,L,F,M,Y,W and the hydrophilic ones are: K,R,D,E,Q,N.

| Gene name | Ancestral type | Protein size | HCA score | HCA bin      | Clusters count | Disorder propensity | Aggregation propensity | Hydrophobic percentage | Hydrophilic percentage |
|-----------|----------------|--------------|-----------|--------------|----------------|---------------------|------------------------|------------------------|------------------------|
| YAL026C-A | multiple       | 145          | 5.54      | high         | 5              | 0                   | 0.407                  | 0.475                  | 0.31                   |
| YAL031W-A | multiple       | 102          | 3.87      | intermediate | 4              | 0                   | 0.284                  | 0.431                  | 0.225                  |
| YAL047W-A | single         | 109          | 4.06      | intermediate | 6              | 0.055               | 0.312                  | 0.451                  | 0.203                  |
| YBL100W-C | multiple       | 39           | 5.97      | high         | 3              | 0.205               | 0.256                  | 0.386                  | 0.361                  |
| YBR056C-B | single         | 52           | -5.44     | low          | 1              | 0.5                 | 0.096                  | 0.211                  | 0.308                  |
| YBR206W   | multiple       | 107          | 1.68      | intermediate | 4              | 0.056               | 0.121                  | 0.299                  | 0.243                  |
| YCL058C   | single         | 152          | 6.28      | high         | 6              | 0                   | 0.546                  | 0.52                   | 0.107                  |
| YCR085W   | multiple       | 117          | 4.33      | intermediate | 6              | 0                   | 0.385                  | 0.512                  | 0.196                  |
| YDL016C   | single         | 100          | 0.78      | intermediate | 3              | 0                   | 0.05                   | 0.37                   | 0.25                   |
| YDL158C   | multiple       | 102          | 7.32      | high         | 2              | 0                   | 0.598                  | 0.509                  | 0.256                  |
| YDR024W   | multiple       | 161          | 0.01      | intermediate | 7              | 0.062               | 0.174                  | 0.336                  | 0.273                  |
| YDR154C   | multiple       | 116          | 0.34      | intermediate | 3              | 0.086               | 0.19                   | 0.379                  | 0.198                  |
| YDR327W   | multiple       | 108          | 1.98      | intermediate | 5              | 0.046               | 0.093                  | 0.381                  | 0.27                   |
| YDR396W   | multiple       | 166          | 4.39      | intermediate | 8              | 0                   | 0.373                  | 0.385                  | 0.222                  |
| YDR426C   | multiple       | 125          | 6.5       | high         | 4              | 0                   | 0.392                  | 0.504                  | 0.232                  |
| YER014C-A | multiple       | 153          | 4.46      | intermediate | 10             | 0.039               | 0.301                  | 0.399                  | 0.248                  |
| YER046W-A | multiple       | 109          | 2.96      | intermediate | 7              | 0.073               | 0.165                  | 0.404                  | 0.212                  |
| YER076W-A | single         | 115          | 3.82      | intermediate | 3              | 0.087               | 0.252                  | 0.409                  | 0.26                   |
| YER087C-A | multiple       | 183          | 2.54      | intermediate | 9              | 0.055               | 0.213                  | 0.382                  | 0.131                  |
| YER133W-A | multiple       | 113          | 2.3       | intermediate | 4              | 0.071               | 0.124                  | 0.39                   | 0.239                  |
| YFR026C   | single         | 169          | 1.56      | intermediate | 6              | 0.101               | 0.213                  | 0.314                  | 0.32                   |
| YGL152C   | multiple       | 225          | 5.4       | high         | 9              | 0                   | 0.409                  | 0.422                  | 0.129                  |
| YGL165C   | multiple       | 192          | 3.51      | intermediate | 7              | 0.026               | 0.349                  | 0.421                  | 0.218                  |
| YGL214W   | single         | 161          | 0.34      | intermediate | 7              | 0.05                | 0.081                  | 0.324                  | 0.267                  |
| YGR011W   | multiple       | 108          | 3.06      | intermediate | 5              | 0                   | 0.352                  | 0.407                  | 0.24                   |
| YGR050C   | multiple       | 118          | 1.79      | intermediate | 5              | 0.153               | 0.042                  | 0.372                  | 0.287                  |
| YGR064W   | multiple       | 122          | 5.04      | intermediate | 5              | 0                   | 0.115                  | 0.353                  | 0.229                  |
| YGR137W   | multiple       | 124          | 2.85      | intermediate | 5              | 0.04                | 0.298                  | 0.434                  | 0.242                  |
| YGR151C   | single         | 111          | 0.26      | intermediate | 7              | 0.045               | 0.135                  | 0.369                  | 0.387                  |
| YHL006W-A | single         | 117          | 2.59      | intermediate | 8              | 0                   | 0.051                  | 0.352                  | 0.155                  |
| YHR022C-A | multiple       | 29           | 4.86      | intermediate | 3              | 0                   | 0                      | 0.447                  | 0.274                  |
| YHR071C-A | single         | 106          | 7.51      | high         | 3              | 0                   | 0.179                  | 0.452                  | 0.264                  |
| YHR180W   | single         | 163          | 1.77      | intermediate | 9              | 0.037               | 0.227                  | 0.404                  | 0.227                  |
| YIL028W   | multiple       | 132          | 4.84      | intermediate | 6              | 0                   | 0.333                  | 0.448                  | 0.219                  |
| YIL030W-A | multiple       | 112          | 5.07      | intermediate | 4              | 0                   | 0.384                  | 0.482                  | 0.242                  |
| YIL066W-A | multiple       | 147          | 2.14      | intermediate | 6              | 0.088               | 0.259                  | 0.341                  | 0.205                  |
| YIL071W-A | multiple       | 158          | 4.16      | intermediate | 8              | 0.082               | 0.399                  | 0.444                  | 0.196                  |
| YIL086C   | multiple       | 102          | -0.97     | intermediate | 5              | 0.157               | 0.118                  | 0.332                  | 0.314                  |
| YJL077W-B | multiple       | 32           | 4.09      | intermediate | 2              | 0                   | 0.156                  | 0.436                  | 0.374                  |
| YJL119C   | single         | 107          | 0.29      | intermediate | 4              | 0.047               | 0.224                  | 0.328                  | 0.326                  |



|           |          |     |       |              |    |       |       |       |       |
|-----------|----------|-----|-------|--------------|----|-------|-------|-------|-------|
| YJL142C   | multiple | 130 | 4.83  | intermediate | 7  | 0.054 | 0.523 | 0.483 | 0.215 |
| YJL211C   | multiple | 147 | 0.02  | intermediate | 7  | 0.095 | 0.136 | 0.328 | 0.273 |
| YJR018W   | multiple | 120 | 4.38  | intermediate | 4  | 0     | 0.25  | 0.39  | 0.184 |
| YJR020W   | single   | 110 | 3.38  | intermediate | 5  | 0     | 0.245 | 0.391 | 0.227 |
| YJR087W   | multiple | 116 | 3.87  | intermediate | 5  | 0     | 0.267 | 0.432 | 0.207 |
| YKL036C   | multiple | 130 | 1.35  | intermediate | 3  | 0.131 | 0.362 | 0.37  | 0.261 |
| YKL053W   | multiple | 124 | 2.3   | intermediate | 6  | 0.056 | 0.452 | 0.54  | 0.217 |
| YKL076C   | multiple | 127 | 3.34  | intermediate | 6  | 0     | 0.299 | 0.447 | 0.259 |
| YKL123W   | multiple | 126 | 4.13  | intermediate | 5  | 0     | 0.31  | 0.428 | 0.317 |
| YKL136W   | multiple | 132 | -0.14 | intermediate | 6  | 0     | 0.311 | 0.355 | 0.182 |
| YKL153W   | multiple | 169 | 3.54  | intermediate | 6  | 0.036 | 0.249 | 0.414 | 0.308 |
| YLL020C   | multiple | 101 | 3.85  | intermediate | 6  | 0.059 | 0.436 | 0.487 | 0.18  |
| YLR041W   | multiple | 106 | 4.71  | intermediate | 3  | 0.094 | 0     | 0.34  | 0.378 |
| YLR171W   | single   | 129 | 4.02  | intermediate | 6  | 0.047 | 0.504 | 0.473 | 0.165 |
| YLR255C   | multiple | 117 | -1.42 | intermediate | 3  | 0.197 | 0.154 | 0.308 | 0.342 |
| YLR412C-A | multiple | 68  | -4.51 | low          | 2  | 0.676 | 0     | 0.221 | 0.515 |
| YLR434C   | multiple | 127 | 5.39  | high         | 4  | 0     | 0.181 | 0.393 | 0.329 |
| YMR052C-A | single   | 121 | 7.22  | high         | 4  | 0     | 0.479 | 0.562 | 0.207 |
| YMR103C   | multiple | 120 | -2.13 | intermediate | 3  | 0.108 | 0.158 | 0.342 | 0.251 |
| YMR119W-A | single   | 124 | 8.48  | high         | 2  | 0     | 0.5   | 0.557 | 0.216 |
| YMR153C-A | multiple | 111 | 4.12  | intermediate | 3  | 0.045 | 0.252 | 0.432 | 0.252 |
| YMR173W-A | multiple | 394 | 2.82  | intermediate | 21 | 0.018 | 0.312 | 0.445 | 0.111 |
| YNL150W   | multiple | 135 | 1.89  | intermediate | 6  | 0.104 | 0.222 | 0.348 | 0.23  |
| YNL226W   | multiple | 136 | 2.43  | intermediate | 5  | 0.037 | 0.228 | 0.434 | 0.236 |
| YNL269W   | multiple | 131 | 1.98  | intermediate | 7  | 0.122 | 0.168 | 0.375 | 0.305 |
| YOR316C-A | multiple | 69  | -1.2  | intermediate | 3  | 0.217 | 0     | 0.318 | 0.274 |
| YOR333C   | multiple | 138 | 5.46  | high         | 6  | 0     | 0.159 | 0.413 | 0.326 |
| YPL056C   | multiple | 101 | 0.53  | intermediate | 6  | 0     | 0.218 | 0.367 | 0.209 |
| YPR126C   | multiple | 102 | 7.54  | high         | 4  | 0     | 0.461 | 0.568 | 0.186 |
| YPR150W   | multiple | 173 | 5.63  | high         | 5  | 0     | 0.416 | 0.462 | 0.169 |

**Supplemental Table S7.** Frequencies of the three STOP codons for different ORF categories.

|                         | UAA  | UAG  | UGA  |
|-------------------------|------|------|------|
| IGORFs                  | 0.45 | 0.24 | 0.31 |
| Occasionally translated | 0.48 | 0.23 | 0.29 |
| Highly translated       | 0.48 | 0.32 | 0.20 |
| CDS                     | 0.47 | 0.23 | 0.30 |

## References

- Altschul SF, Gish W, Miller W, Myers EW, Lipman DJ. 1990. Basic local alignment search tool. *Journal of molecular biology* **215**: 403–410.
- Fernandez-Escamilla A-M, Rousseau F, Schymkowitz J, Serrano L. 2004. Prediction of sequence-dependent and mutational effects on the aggregation of peptides and proteins. *Nature biotechnology* **22**: 1302–1306.
- Guindon S, Dufayard J-F, Lefort V, Anisimova M, Hordijk W, Gascuel O. 2010. New algorithms and methods to estimate maximum-likelihood phylogenies: assessing the performance of PhyML 3.0. *Systematic biology* **59**: 307–321.
- Huang X, Miller W. 1991. A time-efficient, linear-space local similarity algorithm. *Advances in applied mathematics* **12**: 337–357.
- Linding R, Schymkowitz J, Rousseau F, Diella F, Serrano L. 2004. A comparative study of the relationship between protein structure and  $\beta$ -aggregation in globular and intrinsically disordered proteins. *Journal of molecular biology* **342**: 345–353.
- Löytynoja A, Goldman N. 2010. webPRANK: a phylogeny-aware multiple sequence aligner with interactive alignment browser. *BMC bioinformatics* **11**: 579.
- Ranwez V, Douzery EJ, Cambon C, Chantret N, Delsuc F. 2018. MACSE v2: toolkit for the alignment of coding sequences accounting for frameshifts and stop codons. *Molecular biology and evolution* **35**: 2582–2584.
- Ranwez V, Harispe S, Delsuc F, Douzery EJ. 2011. MACSE: Multiple Alignment of Coding SEquences accounting for frameshifts and stop codons. *PLoS one* **6**: e22594.
- Rousseau F, Schymkowitz J, Serrano L. 2006. Protein aggregation and amyloidosis: confusion of the kinds? *Current opinion in structural biology* **16**: 118–126.
- Trifonov EN, Kirzhner A, Kirzhner VM, Berezovsky IN. 2001. Distinct stages of protein evolution as suggested by protein sequence analysis. *Journal of molecular evolution* **53**: 394–401.
