# Supplementary material for: Intergenic ORFs as elementary structural modules of de novo gene birth and protein evolution
Source: HighWire-hosted journal article supplement (doi:10.1101/gr.275638.121), 2021-11-22

Figure 7

**A** Intergenic sequences harbor a wide diversity of potential peptides

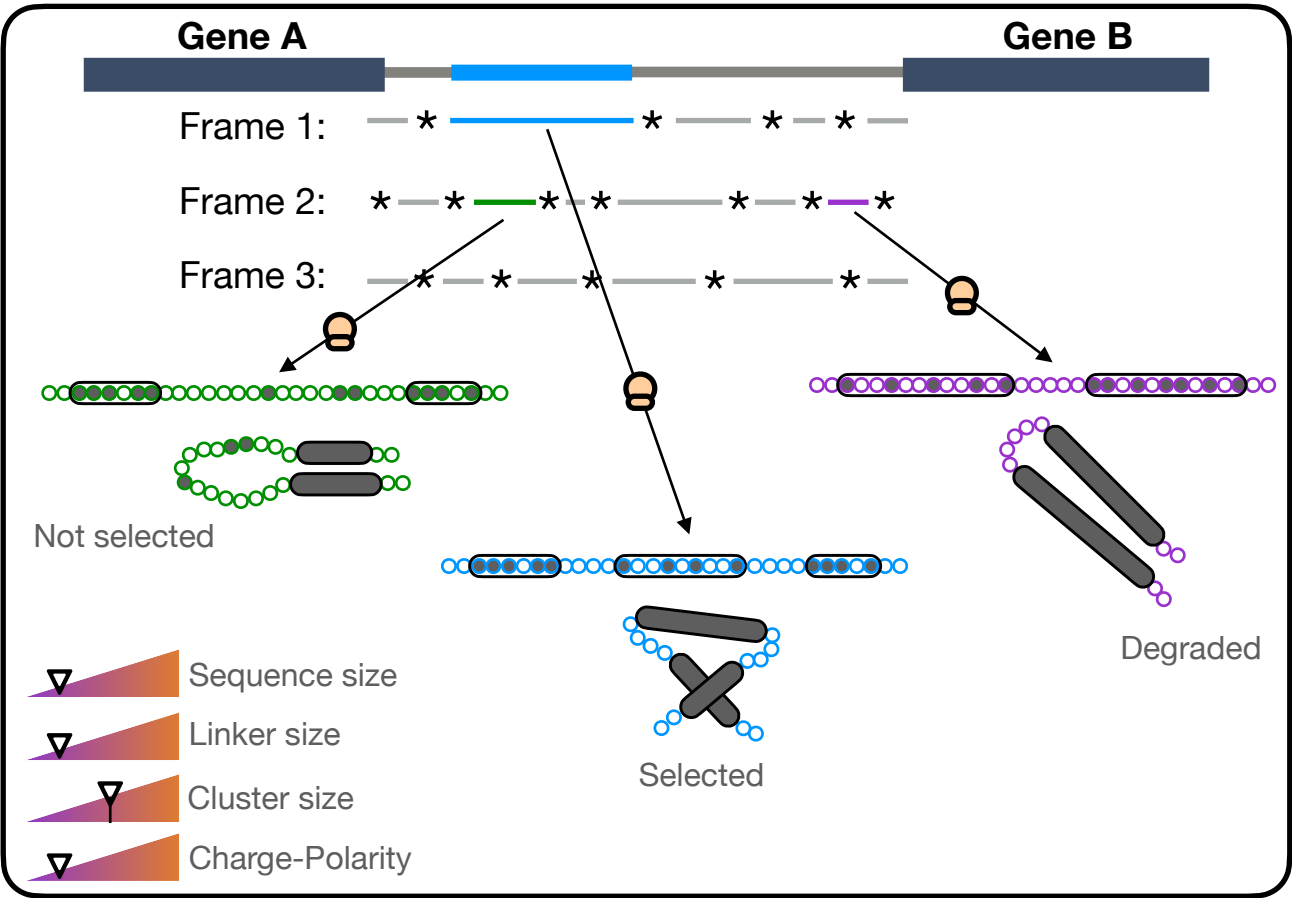

**B** Amino acid substitutions

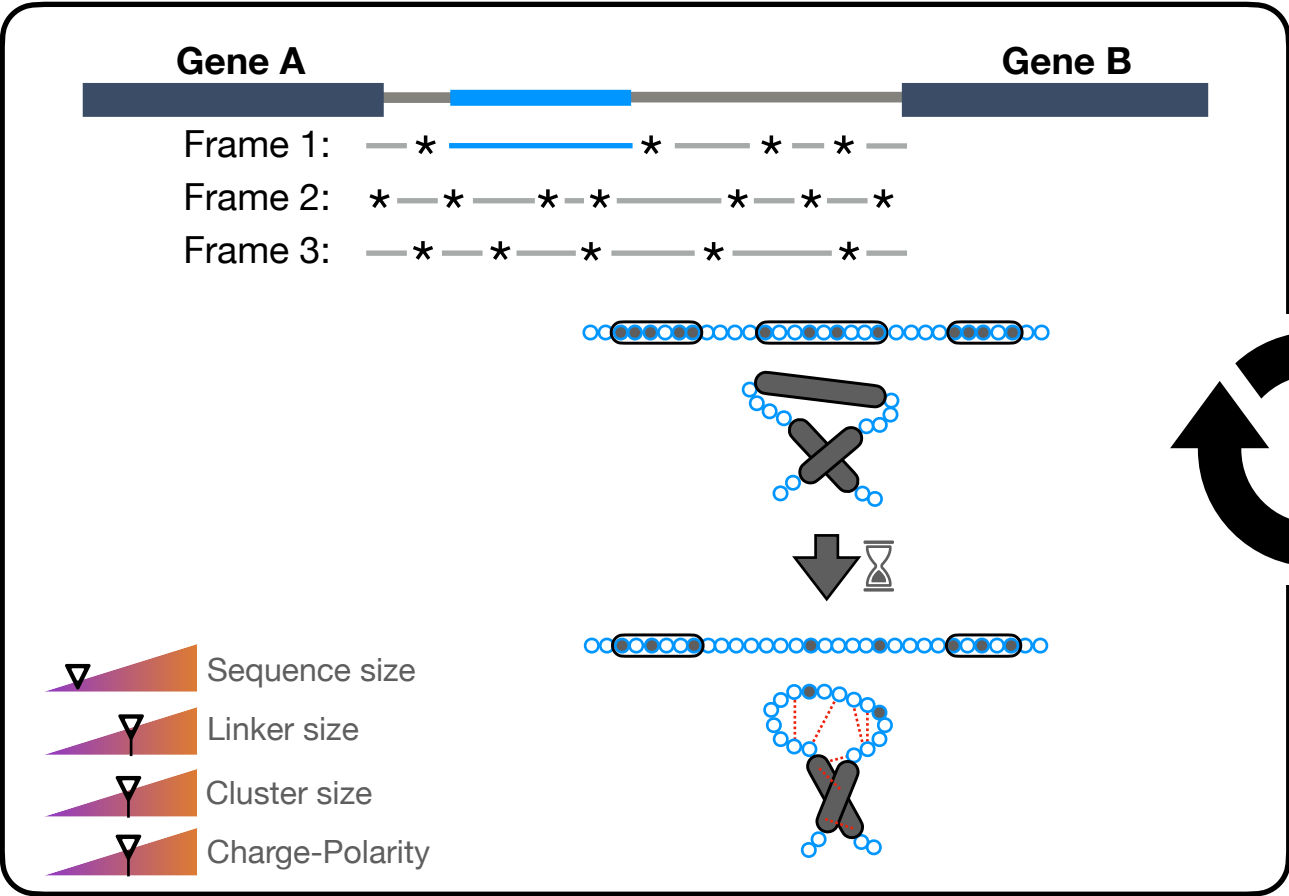

**C** IGORF combination by stop codon mutations or frameshift events

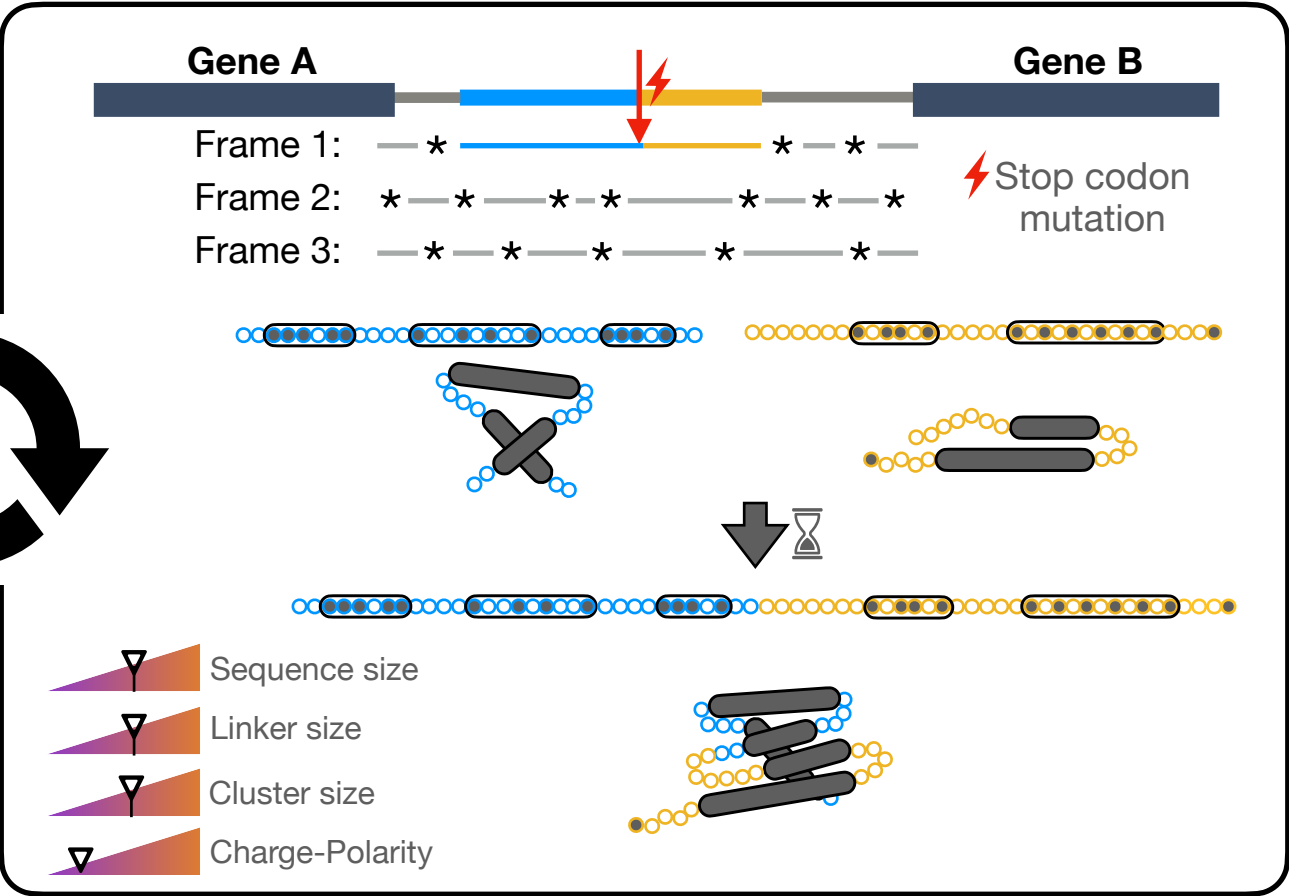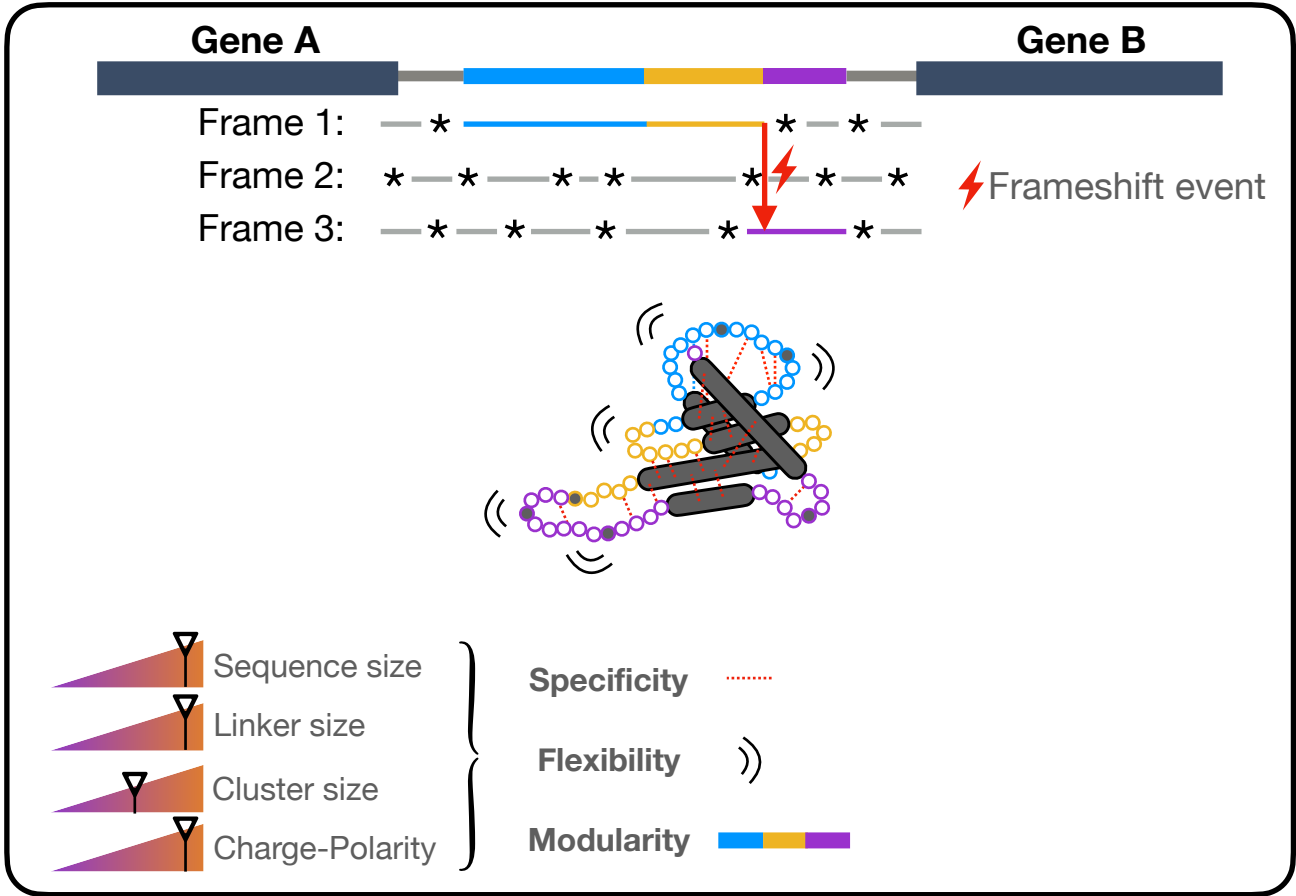

**D** The newborn protein now displays CDS canonical properties

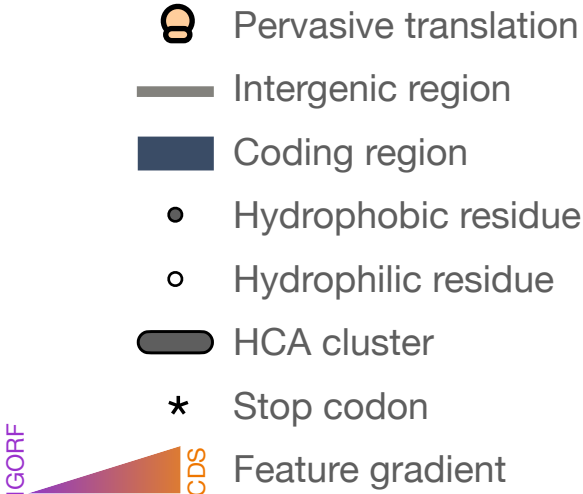

Supplement: Supplemental_Code1.tar.gz [file Papadopoulos_Fig7.pdf › Papadopoulos_Supplemental_Code1_Data/Script_and_data_for_figures/outputs/Papadopoulos_Fig7.pdf]
