# Supplementary material for: Intergenic ORFs as elementary structural modules of de novo gene birth and protein evolution
Source: HighWire-hosted journal article supplement (doi:10.1101/gr.275638.121), 2021-11-22

GSM2147982 – CDS phasing

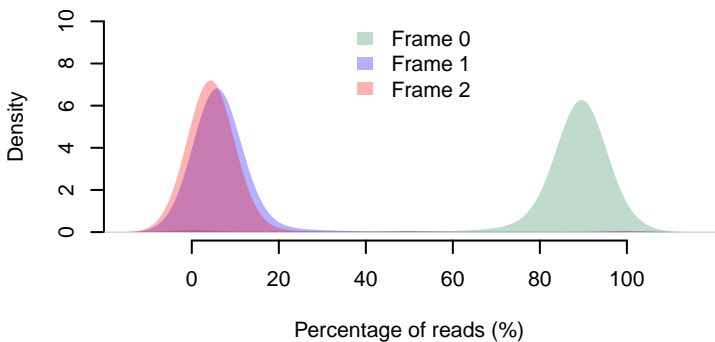

GSM2147982 – CDS periodicity

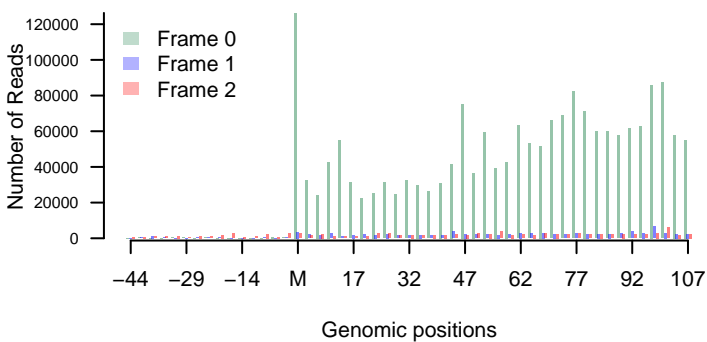

GSM2147983 – CDS phasing

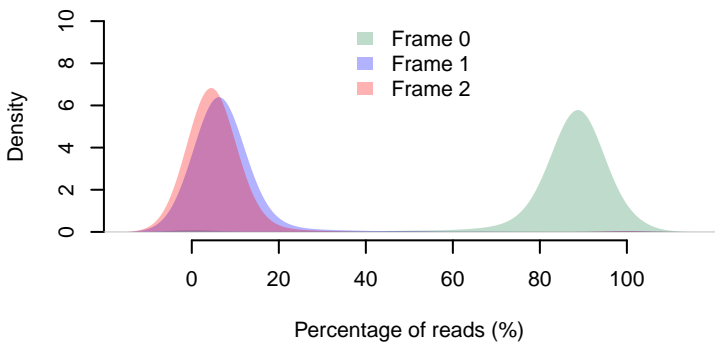

GSM2147983 – CDS periodicity

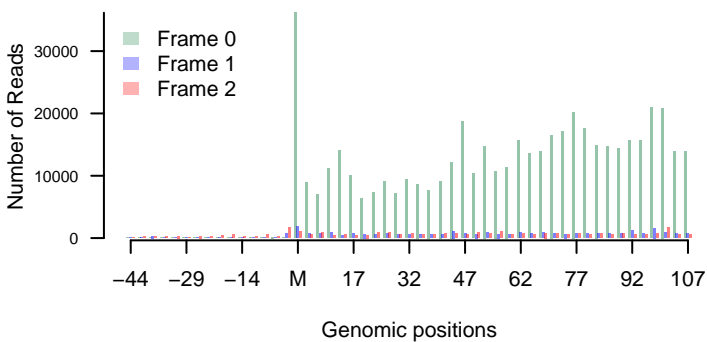

GSM5282046 – CDS phasing

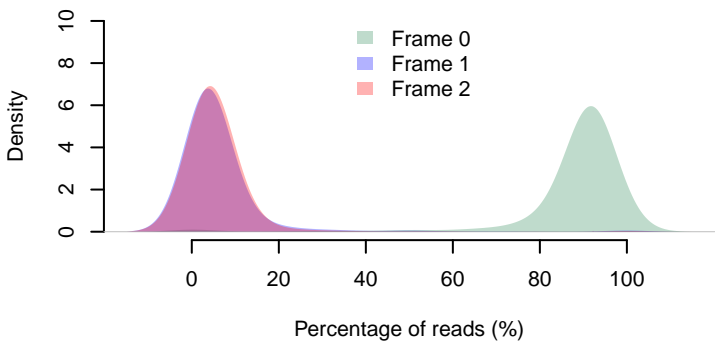

GSM5282046 – CDS periodicity

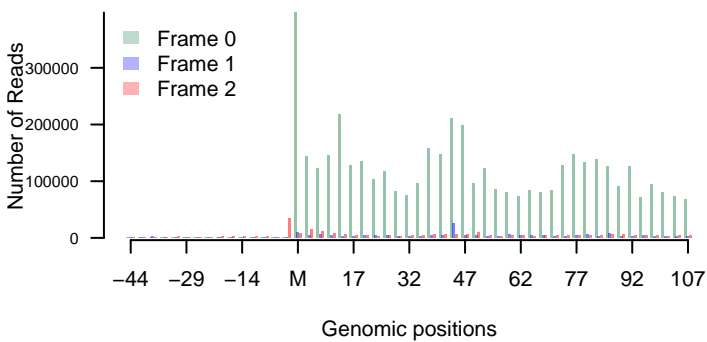

GSM5282047 – CDS phasing

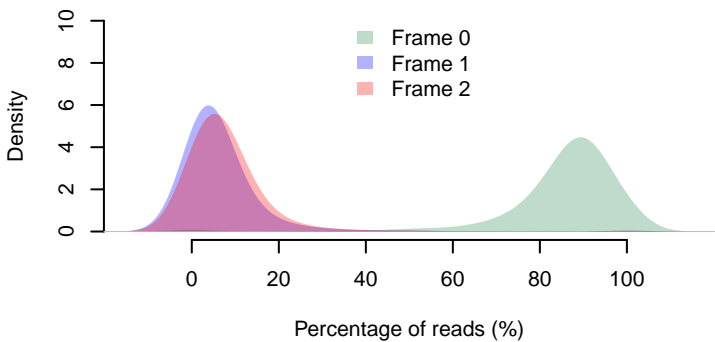

GSM5282047 – CDS periodicity

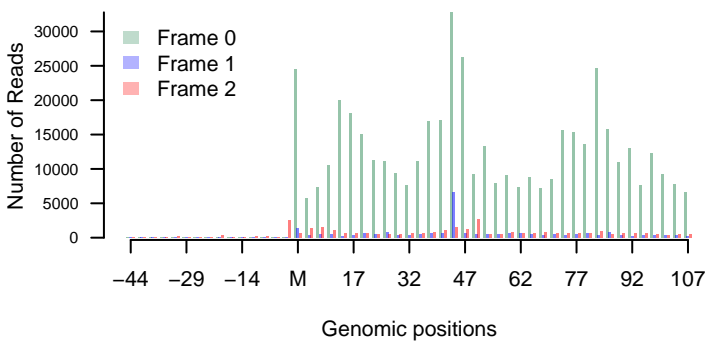

GSM1850252 – CDS phasing

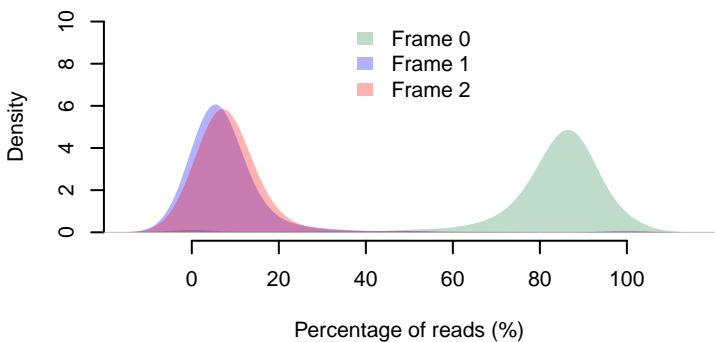

GSM1850252 – CDS periodicity

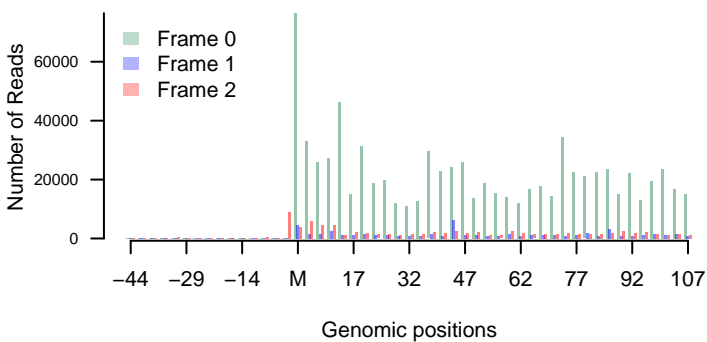

Supplement: Supplemental_Code1.tar.gz [file Supplemental_Fig_S17.pdf › Papadopoulos_Supplemental_Code1_Data/Script_and_data_for_figures/outputs/Supplemental_Fig_S17.pdf]
