# Supplementary material for: Intergenic ORFs as elementary structural modules of de novo gene birth and protein evolution
Source: HighWire-hosted journal article supplement (doi:10.1101/gr.275638.121), 2021-11-22
Supplement: Supplemental_Methods.docx [file Supplemental_Methods.docx]

Supplemental Methods

**Intergenic ORFs as elementary structural modules of de novo gene birth and protein evolution**

Chris Papadopoulos1, Isabelle Callebaut2, Jean-Christophe Gelly3,4,5, Isabelle Hatin1, Olivier Namy1, Maxime Renard1, Olivier Lespinet1, Anne Lopes1

1 Université Paris-Saclay, CEA, CNRS, Institute for Integrative Biology of the Cell (I2BC), 91198, Gif-sur-Yvette, France.

2 Sorbonne Université, Muséum National d'Histoire Naturelle, UMR CNRS 7590, Institut de Minéralogie, de Physique des Matériaux et de Cosmochimie, IMPMC, 75005, Paris, France

3 Université de Paris, Biologie Intégrée du Globule Rouge, UMR_S1134, BIGR, INSERM, F-75015, Paris, France.

4 Laboratoire d’Excellence GR-Ex, Paris, France

5 Institut National de la Transfusion Sanguine, F-75015, Paris, France

## ***Estimation of the fold potential, the aggregation, disorder and TM propensities***

The foldability potential was estimated using a score derived from the HCA (Hydrophobic Cluster Analysis) approach using the HCAtk (Bitard-Feildel and Callebaut 2018; Bitard‐Feildel et al. 2018). HCA divides a protein sequence into (i) clusters gathering strong hydrophobic residues (V, I, L, F, M, Y, W) or cysteines, and (ii) linkers composed of at least 4 non-hydrophobic residues (or a proline). The fold potential of a sequence is determined by its density in hydrophobic clusters but also by the density of hydrophobic amino acids within theseclusters. It is reflected with the HCA score which ranges from -10 to +10 where low and high HCA scores indicate sequences which are likely to be disordered or expected to form aggregates in solution. respectively. The aggregation propensity of a sequence was assessed with TANGO (Linding et al. 2004; Fernandez-Escamilla et al. 2004; Rousseau et al. 2006). Following the criteria presented in Linding et al. (2004), a residue was considered as participating in an aggregation prone region if it was located in a segment of at least five consecutive residues which were predicted as populating a b-aggregated conformation for more than 5%. Then, the aggregation propensity of each sequence is defined as the fraction of residues predicted in aggregation prone segments. The disorder propensity was probed with IUPred (Dosztanyi et al. 2005; Mészáros et al. 2009; Dosztányi 2018; Mészáros et al. 2018) using the short prediction option. To be consistent with the criteria used for assessing the aggregation propensity, we considered a residue as participating in a disordered region if it is located in a segment of at least five consecutive residues, each presenting a disorder probability higher than 0.5. Then, the disorder propensity of each sequence is defined as the fraction of residues predicted in disordered prone segments.

## **Ribosome Profiling analyses**

***Ribosome profiling experiments:*** Cells were grown overnight in 0.5 liter of liquid glucose-YPD till an OD600 of 0.6, 50 microg/microl of cycloheximide were added to the culture and incubated during 5 min and kept at + 4°C. The pellet of yeast cells was recovered by centrifugation during 5 min at 5000 rpm in Beckman F10 rotor at + 4°C. Total RNA and polysomes were extracted as previously described (Baudin-Baillieu et al. 2014). Briefly, cells were lysated by vortex during 15 min in 500 microl of polysome buffer (10 mM Tris-acetate pH7.5 ; 0.1M NaCl and 30 mM Mg-acetate) in presence of glass beads in Eppendorf tube, followed by 5 min of centrifugation at 16 krcf at + 4°C. Ribosome-protected mRNA fragments (RPFs) were generated by the treatment following the ratio of 1 OD260nm of extract with 15 U of RNase I during 1 h at 25°C. Monosomes were collected by 2h15 min centrifugation on a 24% sucrose cushion at +4°C on TLA 110 rotor at 110 krpm. The monosomes were resuspended with 500 microl of polysome buffer. RNA was purified by phenol–chloroform extraction and 28-34 nucleotides RPFs were recovered by electrophoresis in a 17% acrylamide (19/1) 7M urea in 1x TAE gel. These RPFs were depleted of ribosomal RNA by treatment with the Ribo-Zero Gold rRNA removal kit for yeast from Illumina company. RPF libraries were generated with NEBNext Small RNA Sample Prep Kit, according to the manufacturer’s protocol, and were checked with the bioanalyser small RNA kit. Sequencing was performed by a HighSeq 2000 (Illumina) 75-nucleotide single-read protocol.

**References**

Baudin-Baillieu A, Legendre R, Kuchly C, Hatin I, Demais S, Mestdagh C, Gautheret D, Namy O. 2014. Genome-wide translational changes induced by the prion [PSI+]. *Cell Rep* **8**: 439–448.

Bitard-Feildel T, Callebaut I. 2018. HCAtk and pyHCA: A Toolkit and Python API for the Hydrophobic Cluster Analysis of Protein Sequences. *bioRxiv* 249995.

Bitard‐Feildel T, Lamiable A, Mornon J, Callebaut I. 2018. Order in disorder as observed by the “hydrophobic cluster analysis” of protein sequences. *Proteomics* **18**: 1800054.

Dosztányi Z. 2018. Prediction of protein disorder based on IUPred. *Protein Sci* **27**: 331–340.

Dosztanyi Z, Csizmok V, Tompa P, Simon I. 2005. The pairwise energy content estimated from amino acid composition discriminates between folded and intrinsically unstructured proteins. *J Mol Biol* **347**: 827–839.

Fernandez-Escamilla A-M, Rousseau F, Schymkowitz J, Serrano L. 2004. Prediction of sequence-dependent and mutational effects on the aggregation of peptides and proteins. *Nat Biotechnol* **22**: 1302–1306.

Linding R, Schymkowitz J, Rousseau F, Diella F, Serrano L. 2004. A comparative study of the relationship between protein structure and β-aggregation in globular and intrinsically disordered proteins. *J Mol Biol* **342**: 345–353.

Mészáros B, Erdős G, Dosztányi Z. 2018. IUPred2A: context-dependent prediction of protein disorder as a function of redox state and protein binding. *Nucleic Acids Res* **46**: W329–W337.

Mészáros B, Simon I, Dosztányi Z. 2009. Prediction of protein binding regions in disordered proteins. *PLoS Comput Biol* **5**: e1000376.

Rousseau F, Schymkowitz J, Serrano L. 2006. Protein aggregation and amyloidosis: confusion of the kinds? *Curr Opin Struct Biol* **16**: 118–126.
