# Supplementary figures and images for: Intergenic ORFs as elementary structural modules of de novo gene birth and protein evolution
Source: HighWire-hosted journal article supplement (doi:10.1101/gr.275638.121), 2021-11-22

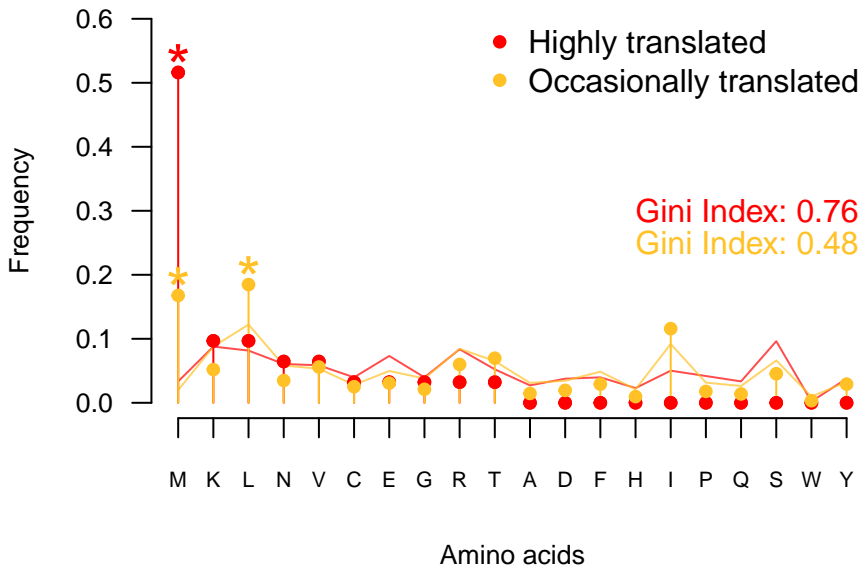

Supplement: Supplemental_Code1.tar.gz [file Supplemental_Fig_S10.pdf › Papadopoulos_Supplemental_Code1_Data/Script_and_data_for_figures/outputs/Supplemental_Fig_S10.pdf]

**A****Linker size**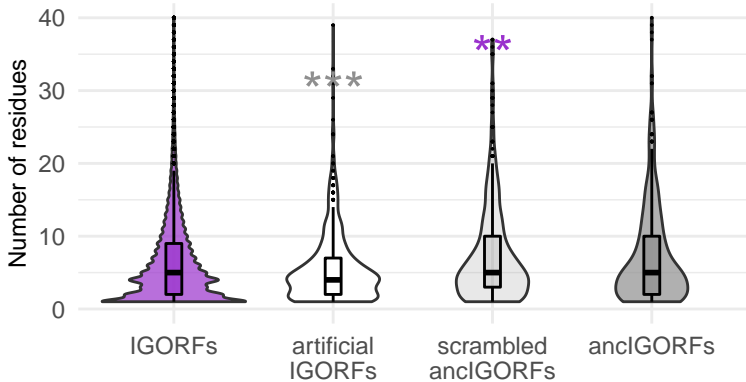**B****Linker size**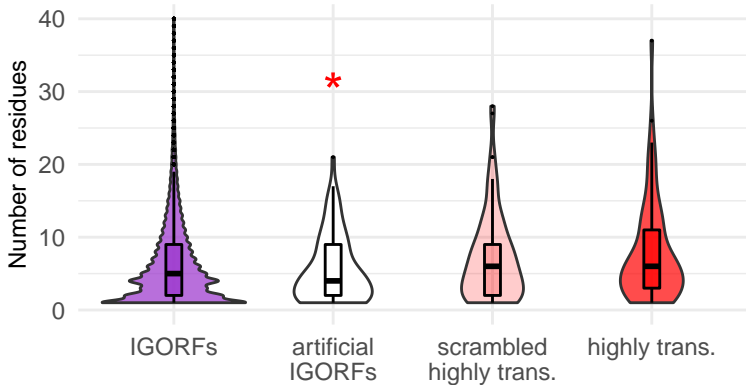

Supplement: Supplemental_Code1.tar.gz [file Supplemental_Fig_S11.pdf › Papadopoulos_Supplemental_Code1_Data/Script_and_data_for_figures/outputs/Supplemental_Fig_S11.pdf]

## Cluster size

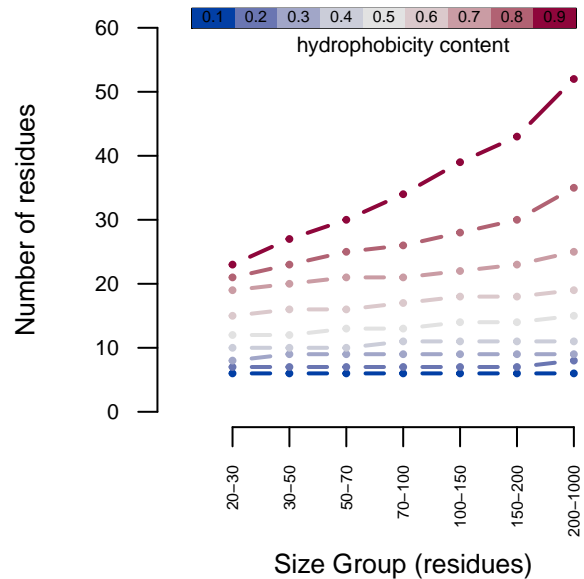

## Linker size

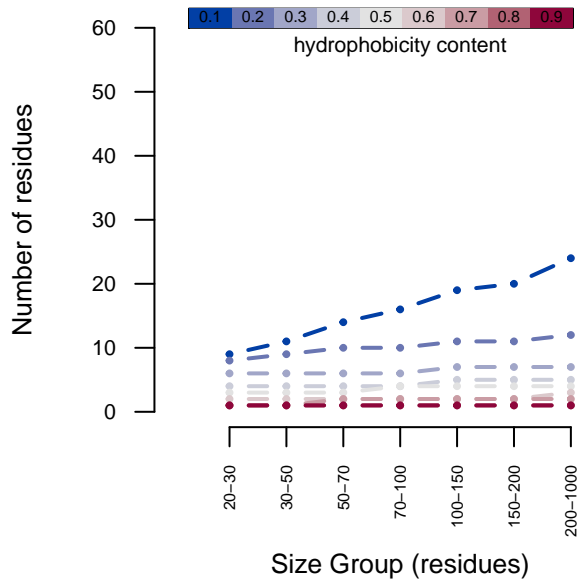

Supplement: Supplemental_Code1.tar.gz [file Supplemental_Fig_S12.pdf › Papadopoulos_Supplemental_Code1_Data/Script_and_data_for_figures/outputs/Supplemental_Fig_S12.pdf]

**A**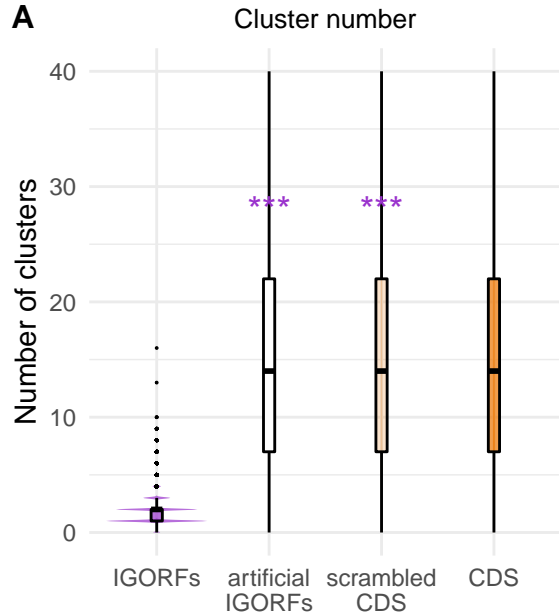**B**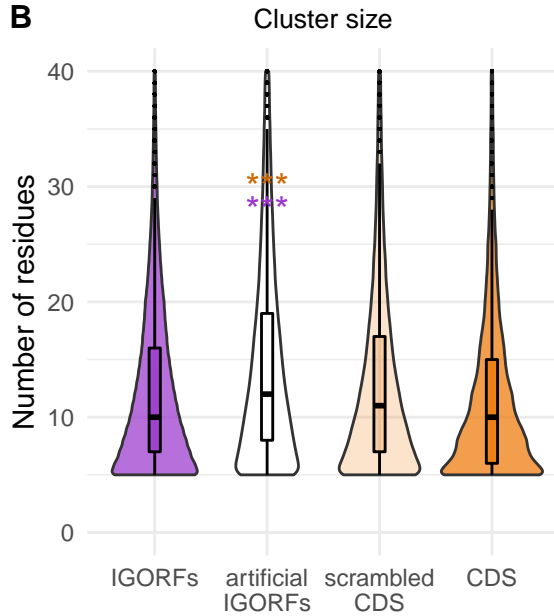**C**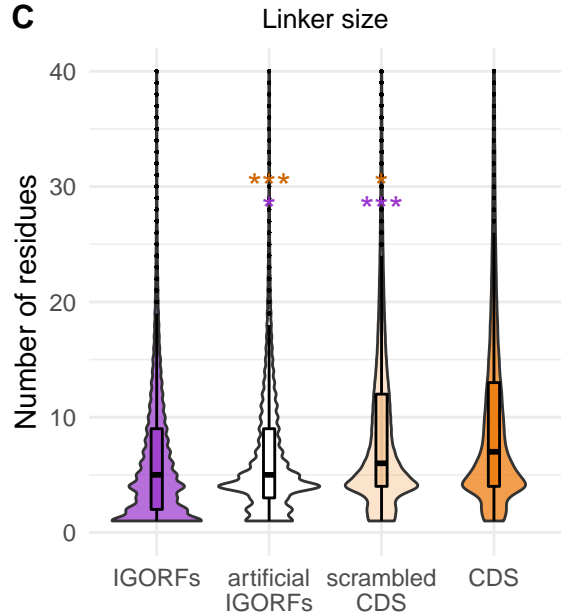

Supplement: Supplemental_Code1.tar.gz [file Supplemental_Fig_S13.pdf › Papadopoulos_Supplemental_Code1_Data/Script_and_data_for_figures/outputs/Supplemental_Fig_S13.pdf]

## Amino acids frequencies

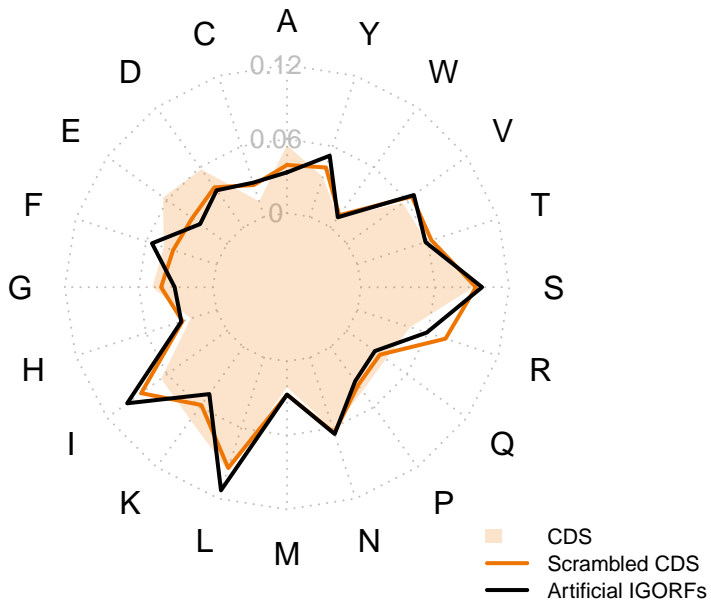

Supplement: Supplemental_Code1.tar.gz [file Supplemental_Fig_S14.pdf › Papadopoulos_Supplemental_Code1_Data/Script_and_data_for_figures/outputs/Supplemental_Fig_S14.pdf]

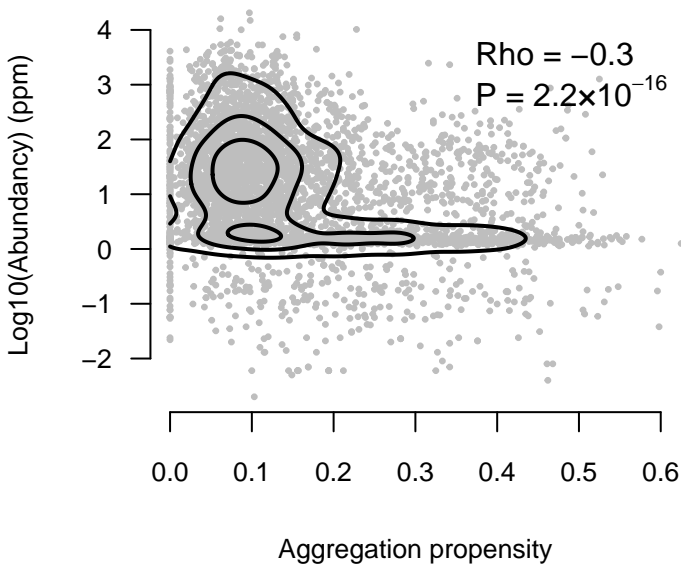

Supplement: Supplemental_Code1.tar.gz [file Supplemental_Fig_S15.pdf › Papadopoulos_Supplemental_Code1_Data/Script_and_data_for_figures/outputs/Supplemental_Fig_S15.pdf]

**A****YMR153C-A**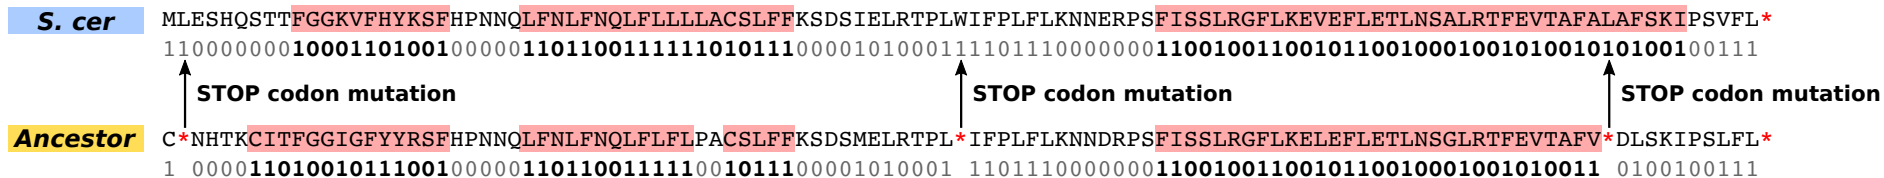**B****YPR126C**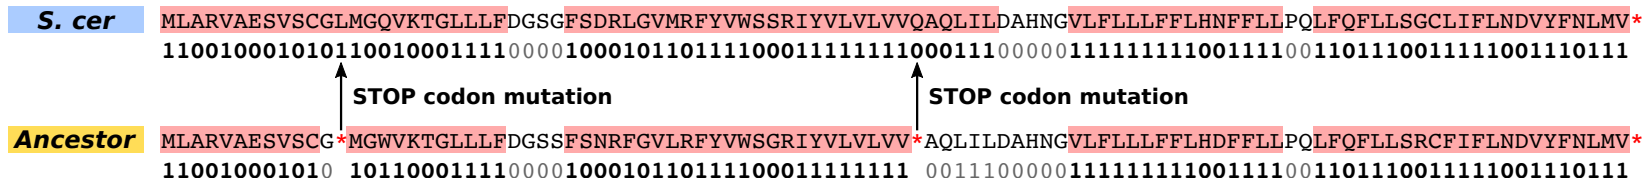

Supplement: Supplemental_Code1.tar.gz [file Supplemental_Fig_S16.pdf › Papadopoulos_Supplemental_Code1_Data/Script_and_data_for_figures/outputs/Supplemental_Fig_S16.pdf]

**A****Sequence size**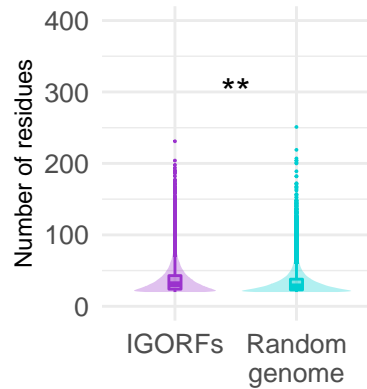**B****Cluster number**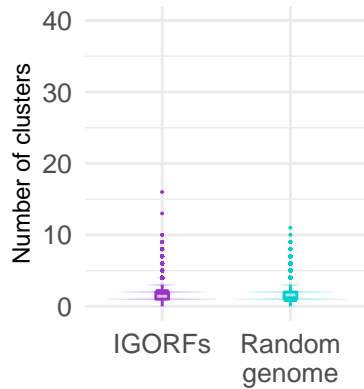**C****Cluster size**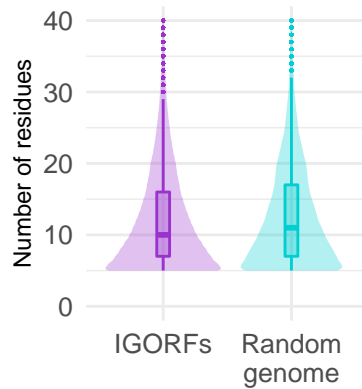**D****Linker size**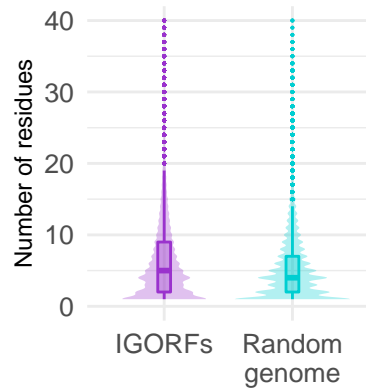

Supplement: Supplemental_Code1.tar.gz [file Supplemental_Fig_S2.pdf › Papadopoulos_Supplemental_Code1_Data/Script_and_data_for_figures/outputs/Supplemental_Fig_S2.pdf]

**A****Amino acids enrichment of HCA clusters**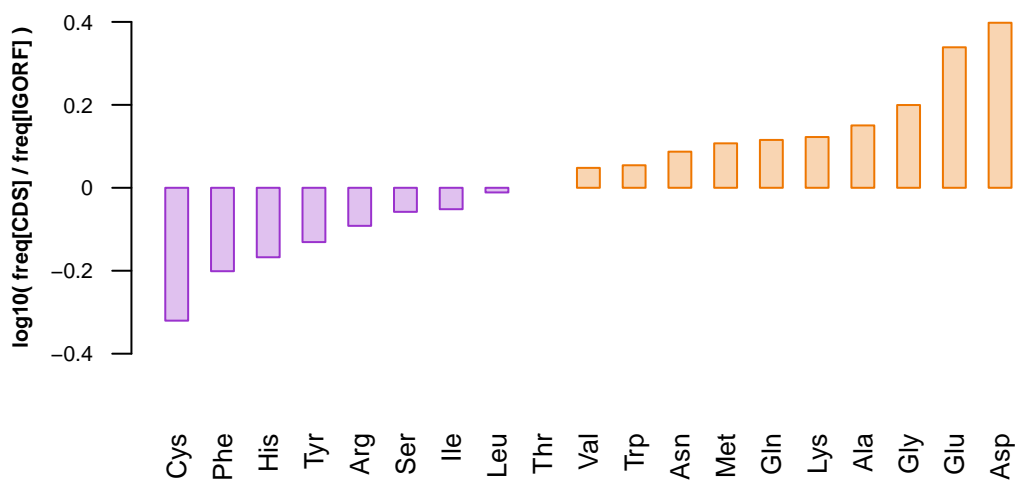**B****Amino acids enrichment of HCA linkers**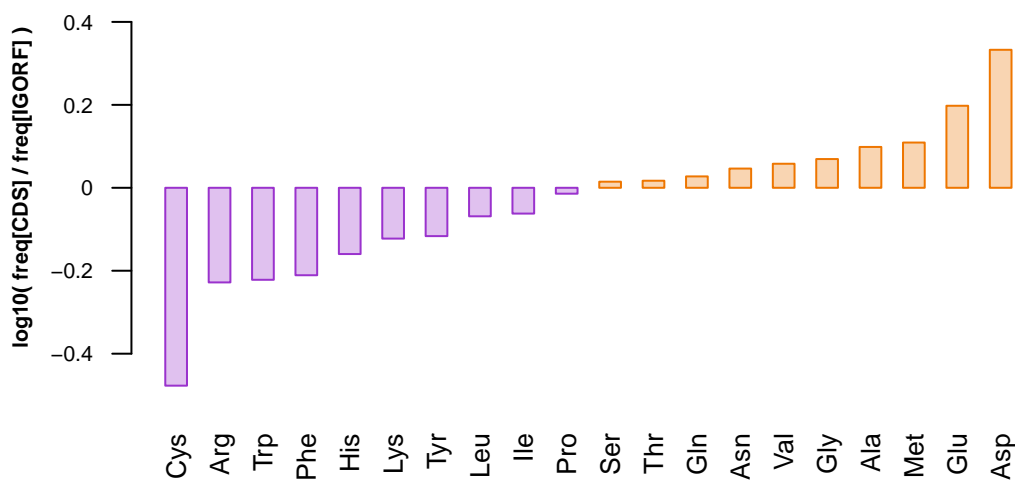

Supplement: Supplemental_Code1.tar.gz [file Supplemental_Fig_S3.pdf › Papadopoulos_Supplemental_Code1_Data/Script_and_data_for_figures/outputs/Supplemental_Fig_S3.pdf]

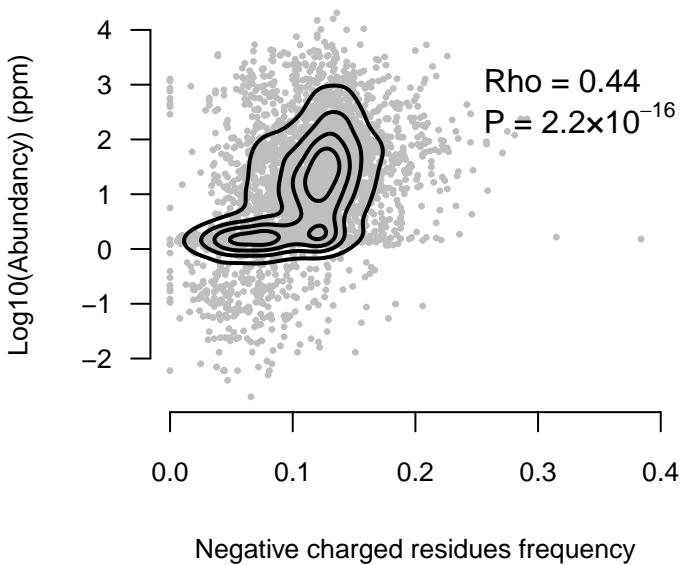

Supplement: Supplemental_Code1.tar.gz [file Supplemental_Fig_S4.pdf › Papadopoulos_Supplemental_Code1_Data/Script_and_data_for_figures/outputs/Supplemental_Fig_S4.pdf]

**A**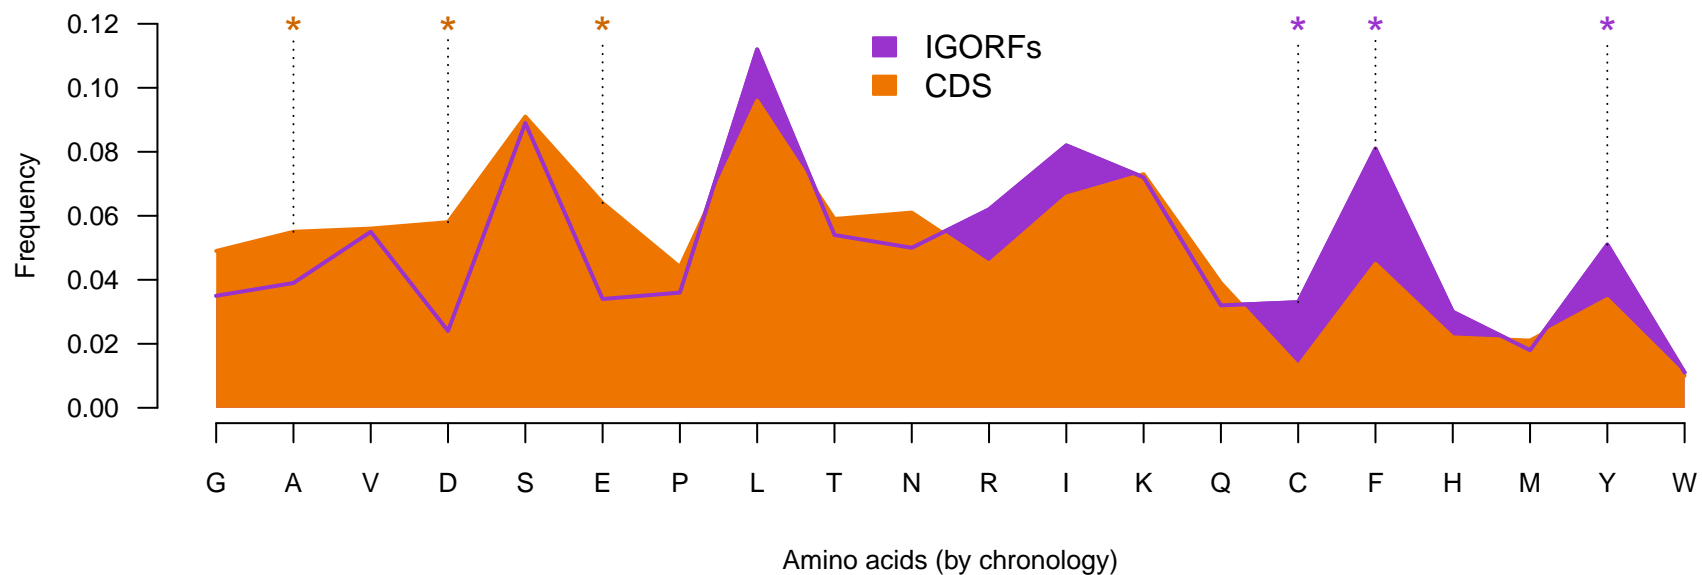**B**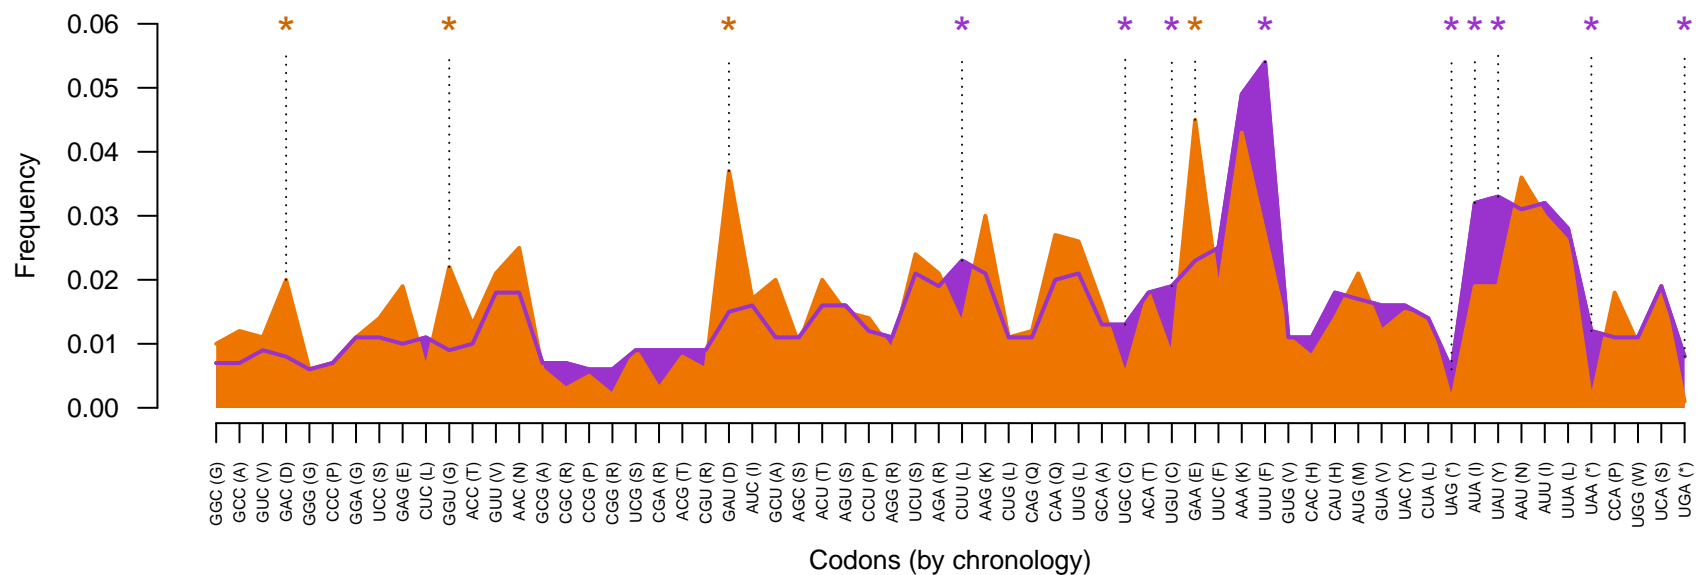

Supplement: Supplemental_Code1.tar.gz [file Supplemental_Fig_S5.pdf › Papadopoulos_Supplemental_Code1_Data/Script_and_data_for_figures/outputs/Supplemental_Fig_S5.pdf]

**A**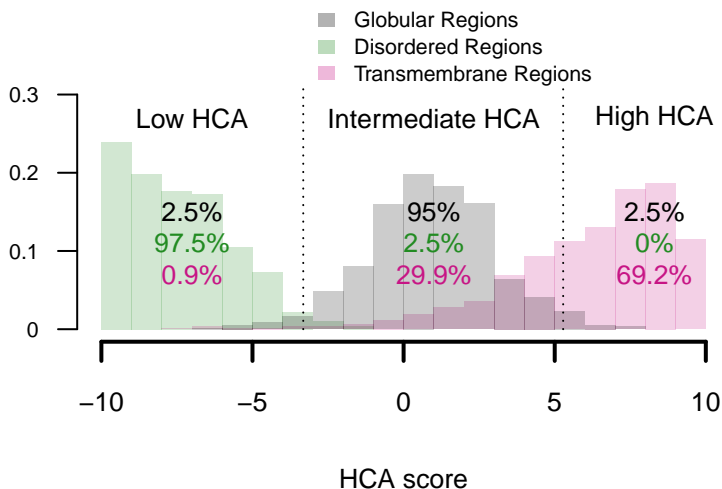**B**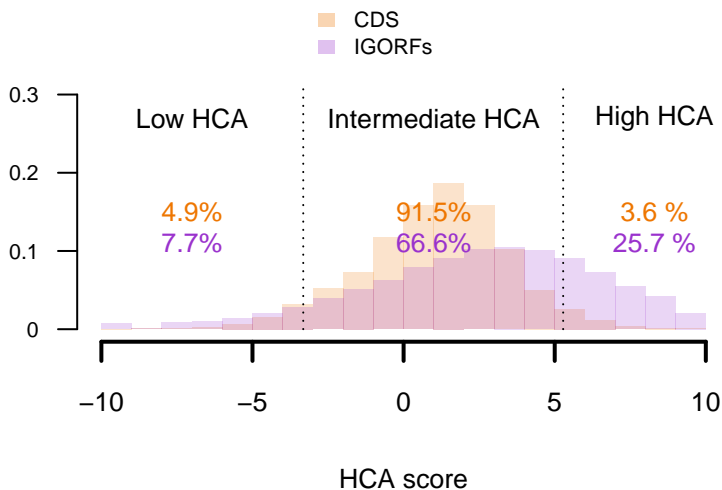

Supplement: Supplemental_Code1.tar.gz [file Supplemental_Fig_S6.pdf › Papadopoulos_Supplemental_Code1_Data/Script_and_data_for_figures/outputs/Supplemental_Fig_S6.pdf]

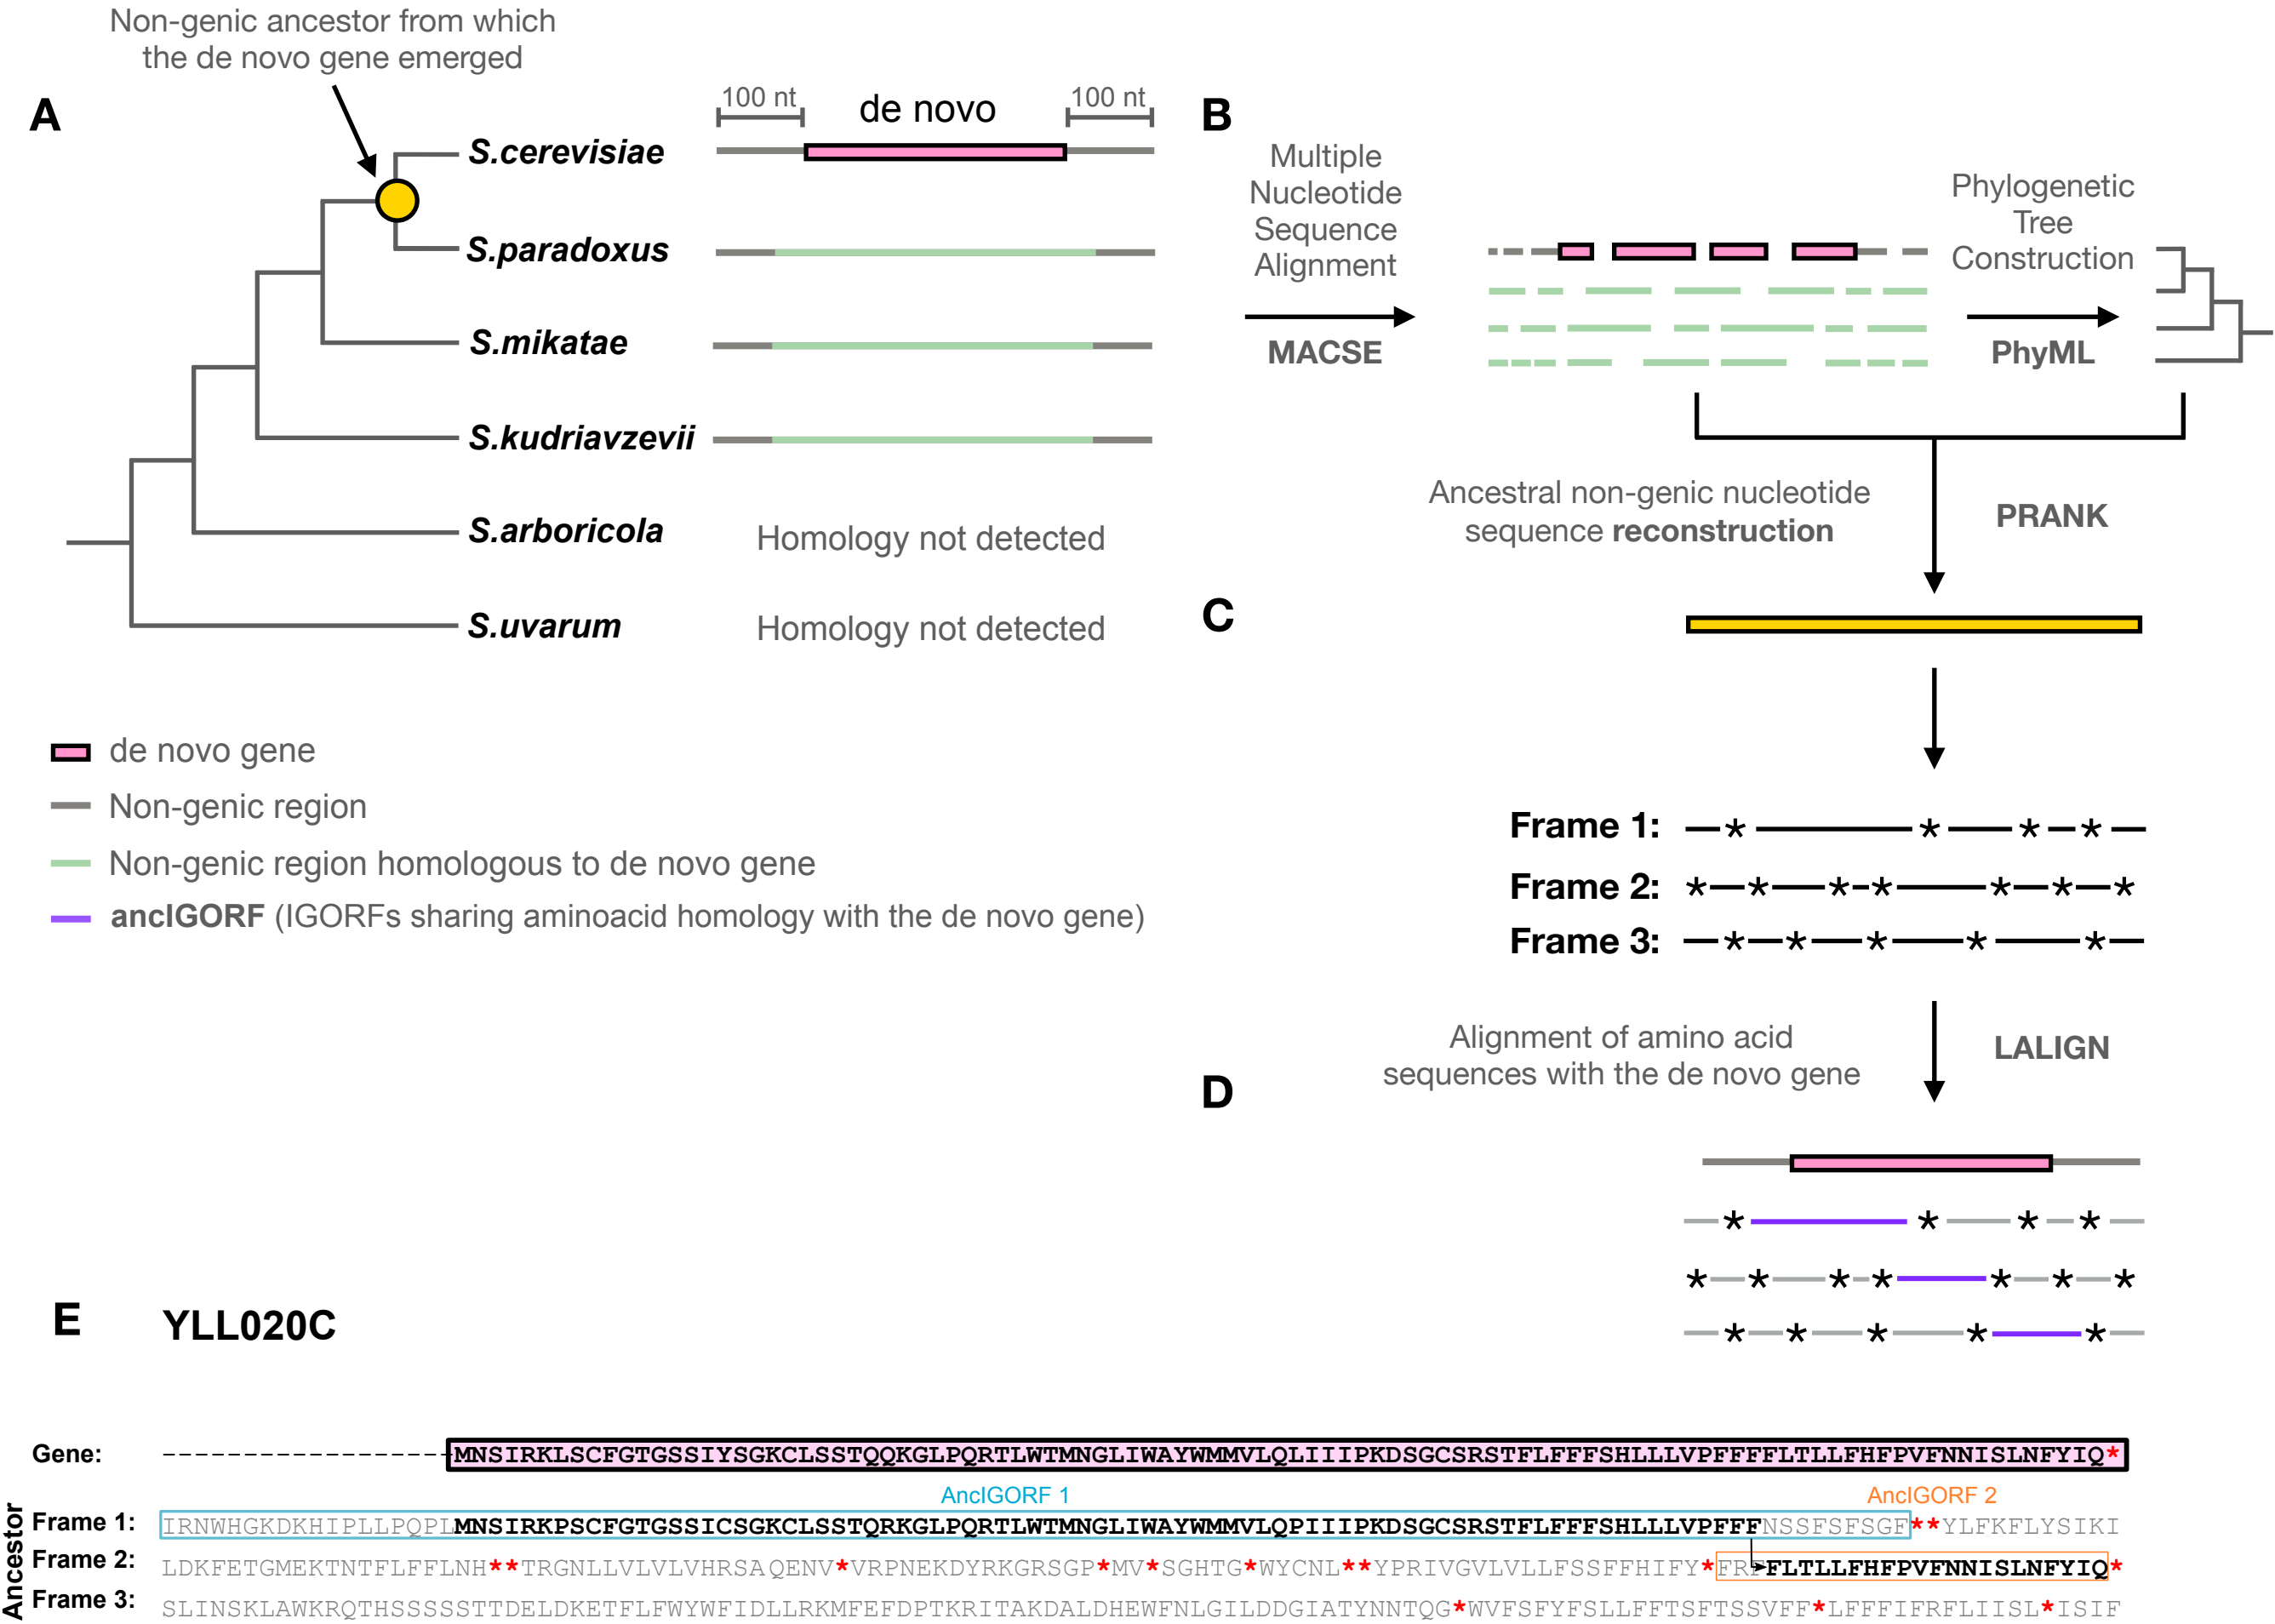

Supplement: Supplemental_Code1.tar.gz [file Supplemental_Fig_S7.pdf › Papadopoulos_Supplemental_Code1_Data/Script_and_data_for_figures/outputs/Supplemental_Fig_S7.pdf]

# YOR333C

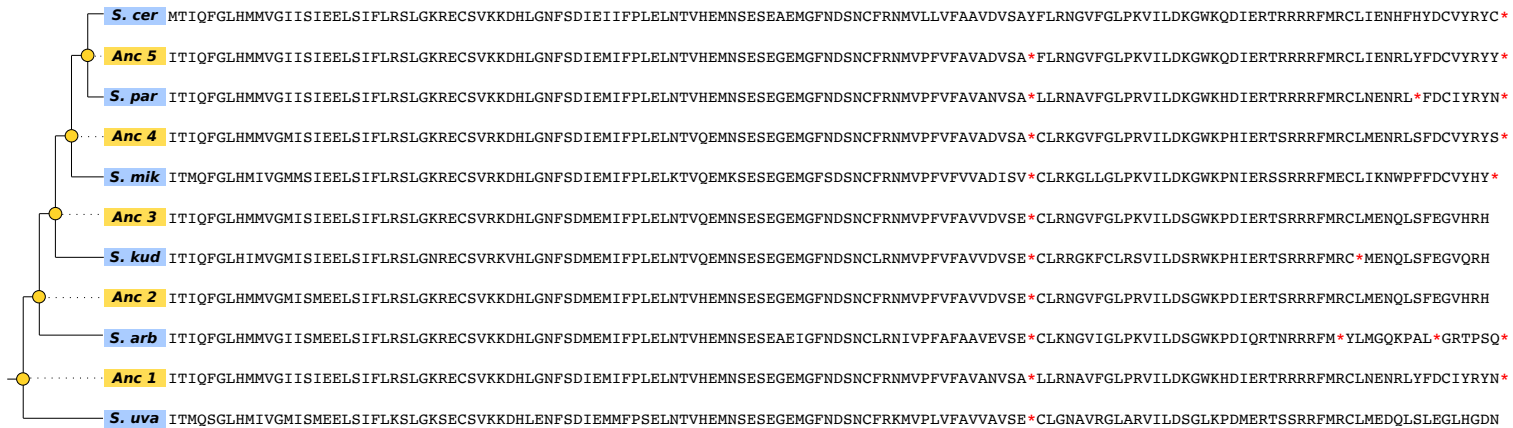

Supplement: Supplemental_Code1.tar.gz [file Supplemental_Fig_S8.pdf › Papadopoulos_Supplemental_Code1_Data/Script_and_data_for_figures/outputs/Supplemental_Fig_S8.pdf]

Size of de novo genes

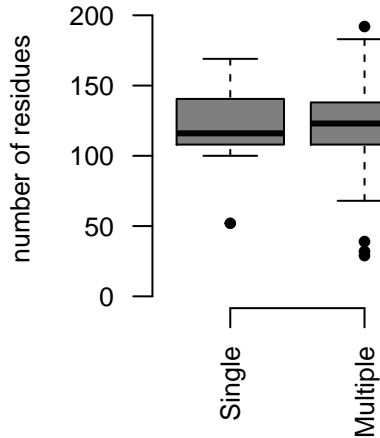

Size of anclGORFs  
per type of de novo gene

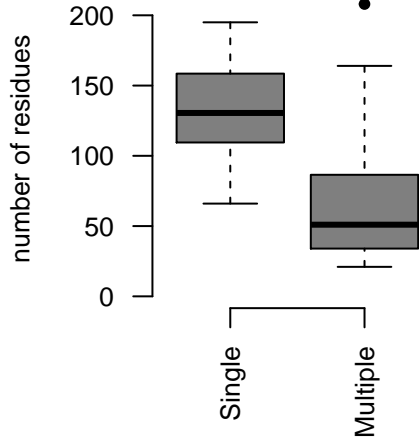

Supplement: Supplemental_Code1.tar.gz [file Supplemental_Fig_S9.pdf › Papadopoulos_Supplemental_Code1_Data/Script_and_data_for_figures/outputs/Supplemental_Fig_S9.pdf]
